# Supplementary material for: Water Uptake by Fresh Indonesian Peat Burning Particles is Limited by Water Soluble Organic Matter
Source: Copernicus journal article supplement (doi:10.5194/acp-2017-136), 2017-03-27
Supplement: Supplementary file [file acp-2017-136-AC1-supplement.zip]

1 **Water Uptake by Fresh Indonesian Peat Burning**  
2 **Particles is Limited by Water Soluble Organic Matter**

3 **Jing Chen<sup>1,\*</sup>, Sri Hapsari Budisulistiorini<sup>1</sup>, Masayuki Itoh<sup>2</sup>, Wen-Chien Lee<sup>1,3</sup>, Takuma**  
4 **Miyakawa<sup>4</sup>, Yuichi Komazaki<sup>4</sup>, LiuDongQing Yang<sup>1</sup>, and Mikinori Kuwata<sup>1,2,\*</sup>**

5 [1] {Earth Observatory of Singapore, Nanyang Technological University, Singapore}

6 [2] {Center for Southeast Asian Studies, Kyoto University, Japan}

7 [3] {Division of Chemistry and Biological Chemistry, Nanyang Technological University,  
8 Singapore}

9 [4] {Research and Development Center for Global Change, Japan Agency for Marine-Earth  
10 Science and Technology, Japan}

11 \* Correspondence to: chen.jing@ntu.edu.sg; kuwata@ntu.edu.sg

12

13

14

15

16

17

## 1 Abstract

2 The relationship between hygroscopic properties and chemical characteristics of Indonesian  
3 biomass burning (BB) particles, which are dominantly generated from peatland fires, was  
4 investigated using the humidified tandem differential mobility analyzer. In addition to peat,  
5 acacia (a popular species at plantation) and fern (a pioneering species after disturbance by fire)  
6 were used for experiments. Fresh Indonesian peat burning particles are almost non-hygroscopic  
7 (mean hygroscopicity parameter,  $\kappa < 0.06$ ) due to predominant contribution of water-insoluble  
8 organics. The range of  $\kappa$  spans from  $\kappa = 0.02$ – $0.04$  (dry diameter = 100 nm, hereinafter) for Riau  
9 peat burning particles, while that for Central Kalimantan ranges from  $\kappa = 0.05$ – $0.06$ . Fern  
10 combustion particles are more hygroscopic ( $\kappa = 0.08$ ), whereas the acacia burning particles have  
11 a mediate  $\kappa$  value (0.04). These results suggest that  $\kappa$  is significantly dependent on biomass types.  
12 This variance in  $\kappa$  is partially determined by fractions of water soluble organic carbon (WSOC),  
13 as demonstrated by a correlation analysis ( $R = 0.65$ ).  $\kappa$  of water soluble organic matter is also  
14 quantified, incorporating the 1-octanol-water partitioning method.  $\kappa$  values for the water extracts  
15 are high, especially for peat burning particles ( $A_0$  (a whole part of water-soluble fraction):  $\kappa =$   
16  $0.18$ ,  $A_I$  (highly water-soluble fraction):  $\kappa = 0.30$ ). This result stresses the importance of both  
17 WSOC fraction and  $\kappa$  of water soluble fraction in determining hygroscopicity of organic aerosol  
18 particles. Values of  $\kappa$  correlate positively ( $R = 0.89$ ) with fraction of  $m/z$  44 ion signal quantified  
19 using a mass spectrometric technique, demonstrating the importance of highly oxygenated  
20 organic compounds to the water uptake by Indonesian BB particles. These results [provide an](#)  
21 [experimentally validated reference for hygroscopicity of organics-dominated particles, thus](#)  
22 [contributing to more accurate estimation of](#)~~can be further utilized for investigating~~ environmental  
23 and climatic impacts ~~of~~ [driven by](#) Indonesian BB particles in both regional and global scales.

24

## 1 **1. Introduction**

2 In Southeast Asia, tropical peatland fires, which occur by combustion of both peat and  
3 vegetation, have become frequent during the last few decades (van der Werf et al., 2010;  
4 Reddington et al., 2014; Marlier et al., 2015; Spracklen et al., 2015; Stockwell et al., 2016). As  
5 one of the most important biomass burning types, ~~t~~The peatland fires keep smoldering for  
6 months, releasing huge amounts of greenhouse gases and fine particles to the atmosphere,  
7 impacting ~~the~~ atmospheric radiation (Levine et al., 1999; Page et al., 2002; van der Werf et al.,  
8 2010). In addition, the peatland burning particles cause transboundary air pollution, influencing  
9 visibility and human health (Kunii et al., 2002; Wang et al., 2004; Marlier et al., 2013; Crippa et  
10 al., 2016; Koplitz et al., 2016). These regional and global climate impacts have been commonly  
11 evaluated using different models (e.g., large eddy simulation (LES) and global climate models  
12 (GCMs)) but with large uncertainties likely due to the inaccurate estimation of cloud  
13 condensation nuclei (CCN) number concentration and subsequent cloud formation and  
14 precipitation processes (Mircea et al., 2005; Rose et al., 2010; Bougiatioti et al., 2016). One of  
15 the essential uncertainty contributors to the complex aerosol-cloud-precipitation interactions  
16 is ~~are closely related with~~ water uptake properties of peatland burning particles, as water vapor  
17 alters aerosol physical and chemical characteristics, such as particle diameter.

18 Water uptake properties of biomass burning particles, including those emitted from  
19 peatlands, have been explored in laboratory through measurements of hygroscopic growth and  
20 CCN activity (Chand et al., 2005; Dusek et al., 2005; Day et al., 2006; Petters et al., 2009;  
21 Carrico et al., 2010; Dusek et al., 2011). In general, freshly emitted biomass burning particles  
22 have been found to be hygroscopic. For instance, the reported range of hygroscopicity parameter,  
23  $\kappa$ , which serves as a metric for water uptake properties, varies from weakly ( $\kappa = 0.02$ ) to highly  
24 hygroscopic ( $\kappa = 0.80$ ) (Day et al., 2006; Petters and Kreidenweis, 2008; Petters et al., 2009;  
25 Carrico et al., 2010). A field observation of water uptake properties of Indonesian biomass  
26 burning plumes also demonstrated that these particles are hygroscopic, with a median  
27 hygroscopic growth in light scattering ( $f(\text{RH})$ ) of 1.65 between 20% and 80% relative humidity  
28 (RH) (Gras et al., 1999). On the other hand, freshly emitted Indonesian peat burning particles  
29 generated in a laboratory were suggested to be non-hygroscopic with respect to quite a low  $f(\text{RH})$   
30 = 1.05 at 90% RH (Chand et al., 2005), and they were almost CCN inactive especially for

1 | [particles larger than 150 nm](#) (equivalent to  $\kappa = 0.05$  for 100 nm particles, [calculated with an](#)  
2 | [assumed surface tension of 0.072 N m<sup>-1</sup> at 25 °C](#)) (Dusek et al., 2005). The uniqueness of water  
3 | uptake property of freshly emitted Indonesian peatland burning particles as well as the  
4 | discrepancy between the previously reported laboratory and field data need to be consistently  
5 | understood based on their chemical compositions for accurate evaluation on the environmental  
6 | impacts.

7 | Chemical composition of biomass burning particles, including these from Indonesian  
8 | peatland fires, is dominated by a complex mixture of organic species (Jimenez et al., 2009; Ng et  
9 | al., 2010; Cubison et al., 2011; Stockwell et al., 2016). The complexity in chemical composition  
10 | inhibits understanding their water uptake properties at molecular levels (Asa-Awuku et al., 2008;  
11 | Psichoudaki and Pandis, 2013; Riipinen et al., 2015). To overcome this difficulty, classification  
12 | of organic compounds using multiple solvents (Carrico et al., 2008; Polidori et al., 2008; Chen et  
13 | al., 2016), liquid-liquid extraction using 1-octanol and water (Kuwata and Lee, 2017), and solid  
14 | phase extraction (Asa-Awuku et al., 2008) has been conducted. Functional group analysis of  
15 | segregated organic matter has also been demonstrated as a strong tool to characterize complex  
16 | mixture of organic compounds (Chen et al., 2016). For instance, chemical characteristics of  
17 | water soluble organic matter (WSOM) have been intensively investigated, revealing that WSOM  
18 | is predominantly consisted of levoglucosan-like species, carboxylic acids, aldehydes, ketones,  
19 | aliphatic alcohols, and polyacids (Decesari et al., 2000; Peng et al., 2001; Suzuki et al., 2001;  
20 | Mayol-Bracero et al., 2002; Chan et al., 2005; Psichoudaki and Pandis, 2013). Recently, the  
21 | important roles of functional groups on water uptake properties were also investigated by both  
22 | theoretical and experimental approaches (Suda et al., 2014; Petters et al., 2016).

23 | In this study, hygroscopic growth of Indonesian peatland burning particles was  
24 | investigated in a series of laboratory experiments to understand the relationships between water  
25 | uptake properties and chemical characteristics. Hygroscopic growth of [various types of fresh](#)  
26 | [peat/biomass burning particles, along with those originating from combustion of peatland dried](#)  
27 | [plants](#), was measured using the humidified tandem differential mobility analyzer (HTDMA)  
28 | (~~Massling et al., 2003; Gysel et al., 2004; Carrico et al., 2008, 2010; Dusek et al., 2011~~) [for the](#)  
29 | [first time](#). Chemical characterization was also conducted using the Aerodyne Time of Flight-  
30 | Aerosol Chemical Speciation Monitor (ToF-ACSM). In addition, ratios of water soluble organic

1 carbon (WSOC) to organic carbon (OC) were quantified. [The concurrent HTDMA and ToF-](#)  
2 [ACSM](#) measurements were also ~~conducted~~ [performed](#) for [the bulk WSOM fraction and its highly](#)  
3 [hydrophilic fraction classified with the 1-octanol-water partitioning method in terms of water](#)  
4 [solubility \(Kuwata and Lee, 2017\).](#) ~~Furthermore, WSOM was fractionated by the 1-octanol-water~~  
5 ~~partitioning method, providing data on hydrophilic fraction (Kuwata and Lee, 2017).~~ [This](#)  
6 [method provides a new angle \(i.e., water solubility\) to characterize chemical properties of](#)  
7 [WSOM, facilitating a more detailed investigation on particle water uptake property with the first](#)  
8 [application of the method in HTDMA measurements of highly hydrophilic organic fraction.](#)  
9 These data were synergistically combined to provide a detailed picture on water uptake  
10 properties of freshly emitted Indonesian peatland burning particles.

## 11 12 **2. Experiment**

### 13 **2.1. Combustion setup**

14 Figure 1(a) shows the experimental setup. Peat and biomass samples were collected at  
15 peatlands in Riau and Central Kalimantan provinces in Indonesia (Table 1). The sampling sites  
16 include both burnt and undisturbed forest areas. In this region, peatland fire frequently reoccurs,  
17 and vast areas are experiencing regeneration of vegetation after fire events. The peat samples  
18 were segregated for different sampling depths, as detailed in Table 1. Two other types of  
19 biomasses from Riau, including *pteridium aquilinum* (called as fern here) and leaves of *acacia*  
20 *mangium* (abbreviated as acacia), were also employed for the experiment. Fern is one of the  
21 major pioneer species after peatland fires (Aswin et al., 2004). Acacia is one of the representative  
22 trees for plantations over drained peatland. Both acacia and fern samples were dried at ambient  
23 temperature after sampling. Further detailed information on the biomass samples is available in  
24 Budisulistiorini et al. (2017).

25 The biomass samples were used without desiccation. Approximately 1.0 g of biomass  
26 sample was combusted in a sealed 100 L stainless steel container using a crucible, which was  
27 heated at 350 °C by a ribbon heater, thermocouple, and PID controller (Kuwata et al., 2017). The  
28 target heating temperature was normally achieved within 2 – 3 min. Visual inspection confirmed  
29 that the combustion condition was mostly smoldering, consistent with a previous report (Usup et

1 al., 2004). Particle-free air was continuously supplied to the container. Excess amount of  
2 particle-free air was released to the laboratory, allowing conducting the experiments at room  
3 pressure. Particles generated by the burning experiments were diluted by a two-stage dilution  
4 system. Size distributions of biomass burning particles were measured using the Scanning  
5 Mobility Particle Sizer (SMPS, TSI Inc.). The measurement range of the SMPS was set as 14.6 –  
6 685.4 nm, and time resolution was 3-min. Chemical compositions of particles were quantified  
7 using the Aerodyne ToF-ACSM (Fröhlich et al., 2013), while water uptake property was  
8 measured using the HTDMA (Massling et al., 2003, 2007; Duplissy et al., 2009). Online  
9 instruments such as SMPS, ToF-ACSM, and HTDMA were all operated following the dilution.  
10 Each combustion experiment lasted for ~ 1 h. Detailed descriptions about the ToF-ACSM and  
11 HTDMA are provided in the following sections.

12 Two filter samples were also collected simultaneously for each of the experiments.  
13 Particles were collected onto two 47 mm diameter filters housed in stainless steel filter holders  
14 (BGI Inc.) for half an hour at flowrates of 5.0 lpm. Teflon filters (0.2  $\mu\text{m}$  pore size, Fluoropore™,  
15 Sigma Aldrich) were used for WSOM samples, while quartz filter samples were employed for  
16 carbon analysis by the thermal-optical method. The collected samples were stored under  
17 refrigeration at  $-20\text{ }^{\circ}\text{C}$  until analysis.

## 18 **2.2. Extraction and nebulization of WSOM**

19 Filter samples were extracted using approximately 20 ml of ultrapure water (Type I) by  
20 sonicating them for 30-min at room temperature. The resulting solutions were filtered through  
21 0.2  $\mu\text{m}$  PTFE syringe filters (514-0070, VWR), yielding water extracts (denoted as  $A_0$ , i.e., a  
22 whole part of or bulk water-soluble fraction). An aliquot of  $A_0$  was mixed with the same volume  
23 (5 ml) of 1-octanol (Wako first grade, Wako) using a separatory funnel for classification by 1-  
24 octanol-water extraction (Valvani et al., 1981). The aqueous phase following the 1-octanol-water  
25 extraction is denoted as  $A_1$  (slightly less than 5 ml), corresponding to the highly water-soluble  
26 fraction. Details of the extraction method are provided in Kuwata and Lee (2017).

27 The aqueous solutions were nebulized using a glass nebulizer. A mass flow controller  
28 (MC-20 SLPM-D, Alicat Scientific, Inc.) was used to regulate the flow rate (3.5 lpm) of particle-  
29 free air supplied to the nebulizer. Following nebulization, the sample was desiccated by a

1 diffusion dryer (Model 42000, Brechtel Manufacturing, Inc.) filled with silica gel (Chameleon  
2 83000.360, VWR International). The desiccated particles were measured using the HTDMA,  
3 ToF-ACSM, and SMPS. The analysis of  $A_0$  and  $A_I$  were conducted only for peat (sampled from a  
4 burnt area, Riau-4), acacia, and fern samples.

### 5 **2.3. HTDMA**

6 Hygroscopic growth of particles was measured using the HTDMA (Massling et al., 2003,  
7 2007; Duplissy et al., 2009; Gysel et al., 2009). The HTDMA system consists of three major  
8 components: 1) the first DMA (TSI Inc. Model 3081) to select monodisperse particles of a  
9 specific diameter, 2) the humidification unit for hydrating the classified particles at a target RH,  
10 and 3) the second DMA (TSI Inc. Model 3081) and a condensation particle counter (CPC, TSI  
11 Inc. Model 3775) to detect humidified size distributions (Figure S1).

12 Aerosol particles were dried using a diffusion dryer (Model 42000, Brechtel  
13 Manufacturing, Inc.), and introduced to the first DMA at a flow rate of 0.3 lpm. The first DMA  
14 selected 50, 100, and 200 nm particles. Both the first and second DMAs were operated at sheath-  
15 to-sample flow ratios of 10:1. The resulting monodisperse particles were exposed to a predefined  
16 RH environment using two Nafion membrane tubes (Permapure Inc. Model MD-110-12S-4) in  
17 series. The target RH, which was set at 90%, was regulated by controlling the flow ratio of  
18 humidified and dry air flows via a PID controlling software (National Instruments Inc. Labview).  
19 The particle residence time between the humidifier and the second DMA was approximately  
20 10 seconds. The RH-controlled humid air was used as the sheath flow for the second DMA. The  
21 RH and temperature of the second DMA were continuously monitored at both the sample inlet  
22 and sheath outlet using two capacitive RH and temperature probes (Rotronic Inc. Hygroclip  
23 HC2-S). The RH differences between the sample and sheath flows were less than 2%. RH of  
24 humidified sample air was slightly higher than that of the sheath outflow for the setup shown in  
25 Figure S1.

26 The operating conditions of the DMAs were checked using  $100 \pm 3$  nm polystyrene latex  
27 particles (PSL, Thermo Scientific Inc., Cat. No.: 3100A). Hygroscopic growth of particles in the  
28 HTDMA was calibrated by measuring growth factor ( $g$ ), which is defined as a diameter ratio of  
29 humidified ( $D(RH)$ ) and dry particles ( $D_0$ ) ( $g = (D(RH)/D_0)$ ), of ammonium sulfate particles.

1 The measured value of  $g$  at RH = 85% was 1.71 ( $D_0 = 150$  nm), which is comparable to a  
2 literature data ( $g = 1.69$ ) (Tang and Munkelwitz, 1994). The stability of detected RH of the  
3 HTDMA system was within  $\pm 1.0\%$  RH (peak-to-peak) for the target RH of 90% (see Figure S2).  
4 A volume mean growth factor (GF) was calculated using measured probability density function  
5 of  $g$  (i.e.,  $c(g, D_0)$ ) as  $GF = (\int_0^\infty g^3 c(g, D_0) dg)^{1/3}$ .

## 6 **2.4. Chemical characterization**

7 The Aerodyne ToF-ACSM was utilized to measure chemical compositions of non-  
8 refractory submicron particles (NR-PM<sub>1</sub>) (Fröhlich et al., 2013). Five specific chemical  
9 components, including organic matter (OM), sulfate (SO<sub>4</sub><sup>2-</sup>), nitrate (NO<sub>3</sub><sup>-</sup>), ammonium (NH<sub>4</sub><sup>+</sup>),  
10 and chloride (Cl<sup>-</sup>), were quantitatively detected (Allan et al., 2003), with a time resolution of 3-  
11 min.

12 Bulk OC, elemental carbon (EC), and WSOC contents were also analyzed for 10 samples  
13 (Table 3) using quartz-fiber filter samples (47 mm in diameter). All the quartz-fiber filters were  
14 prebaked at 900 °C for 3 h before sampling. The filter samples were stored in a refrigerator (-20  
15 °C) until analysis. For each sampling, a back-up quartz-fiber filter was used to account for  
16 potential influence of adsorption of gas phase organic components (Turpin et al., 1994). OC  
17 loading on the back-up filter was subtracted from that on the front filter to estimate particulate  
18 OC (i.e., corrected OC).

19 OC and EC were analyzed by thermal-optical reflectance analysis (Chow et al., 1993)  
20 using a Sunset Laboratory OC/EC Analyzer, following the IMPROVE-A protocol. WSOC was  
21 quantified with a Sievers 800 Total Organic Carbon (TOC) Analyzer after extraction of biomass  
22 burning filter samples by water. A portion (8 mm  $\phi$ ) of each WSOC sample was extracted using  
23 10 ml of HPLC-grade water. The samples were shaken by an orbital shaker for 21 h. The  
24 extracted sample solutions were filtered with syringe filters (pore size of 0.2  $\mu$ m) prior to  
25 injection to the TOC analyzer. The particulate WSOC of peat burning particles was also  
26 corrected following the similar procedure to that of particulate OC.

27



### 1 3. Results and discussion

2 Both the HTDMA and chemical analysis data are summarized in Table 2 and 3. The ToF-  
3 ACSM and OC/EC data (Table 3) demonstrate that chemical composition of submicron biomass  
4 burning particles is dominated by organic species, accounting for approximately 99% in mass  
5 (Budisulistiorini et al., 2017). Contributions of other species, including inorganic ionic species  
6 and EC, were minimal. In the following, the relationships between hygroscopic property and  
7 chemical characteristics of organic species are discussed.

#### 8 3.1. Hygroscopic growth factor

9 Figure 2 shows normalized particle number size distributions of peat sampled from a  
10 burnt area (Riau-4), acacia leaves, and fern burning particles following hygroscopic growth at  
11 RH = 90% ( $D_0 = 100$  nm). The data shown in Figure 2 include both online (a) and offline ((b):  $A_0$ ,  
12 and (c):  $A_I$ ) measurements. In all cases, narrow monodisperse distributions were observed ([see](#)  
13 [Figure S3](#)), demonstrating that chemical compositions of particles were uniform (Gysel et al.,  
14 2007; Carrico et al., 2010). For online measurements, diameter change induced by hygroscopic  
15 growth was minimal for the peat and acacia burning particles ( $g = 1.05 \sim 1.09$ ), while diameter  
16 of fern burning particles significantly increased following exposure to high RH ( $g = 1.17$ ). The  
17 variation in hygroscopic properties is attributed to differences in organic chemical composition,  
18 as these biomass burning particles contain negligible fractions of inorganic ionic species  
19 (Budisulistiorini et al., 2017).

20 Table 2 summarizes all the values of GF. Values of GF for most of peat samples from  
21 burnt peatland in Riau were less than 1.1. Sampling depths of peat did not significantly affect GF.  
22 There was no clear size-dependence of GF. For instance, GF values of particles from combustion  
23 of peat at drained and burnt areas in Riau were  $1.07 \pm 0.04$  ( $D_0 = 50$  nm),  $1.06 \pm 0.02$  ( $D_0 =$   
24  $100$  nm), and  $1.07 \pm 0.02$  ( $D_0 = 200$  nm). Particles emitted from the undisturbed forest area in  
25 Riau (i.e., Riau-Zam) were more hygroscopic (GF = 1.11 for  $D_0 = 100$  nm) than those generated  
26 from other samples from Riau, while GF of particles emitted by combustion of a peat sample  
27 from the secondary forest in Riau (i.e., Riau-SF) was very similar to those from Riau peat  
28 samples from burnt areas (i.e., Riau-1~4). The similarity is probably due to the short distance  
29 between the two sampling sites (less than 10 km). Particles emitted from peat samples collected

1 at Central Kalimantan (i.e., C.K.-DB and C.K.-DF) were relatively more hygroscopic ( $GF > 1.11$ )  
 2 than those from Riau.

3 Hygroscopic growth of bulk water-soluble fraction ( $A_0$ ) is much more significant than  
 4 those of the online measurements. Specifically, the mean diameter growth factors were 1.34  
 5 (peat sampled from a burnt area, Riau-4), 1.23, (acacia), and 1.28 (fern) for 100 nm particles.  
 6 The significant hygroscopic growth of  $A_0$  from peat burning particles could be due to high water  
 7 uptake by the highly water-soluble fraction,  $A_I$  ( $GF = 1.50$ ). The GFs of  $A_I$  for acacia and fern  
 8 burning particles were 1.42 and 1.33, respectively. Although water uptake by fresh peat burning  
 9 particles was much less than those of vegetation burning particles, the water soluble fraction of  
 10 peat burning particles was the most hygroscopic. This result stresses the importance of  
 11 understanding hygroscopic properties of WSOM as well as WSOC fraction in total OC.

### 12 3.2. Hygroscopicity parameter ( $\kappa$ )

13 Hygroscopicity parameter ( $\kappa$ ) was calculated using the  $\kappa$ -Köhler theory (Petters and  
 14 Kreidenweis, 2007):

$$15 \quad \kappa = (GF^3 - 1) \cdot \left( \frac{\exp\left(\frac{4\sigma_{s/a} \cdot M_w}{\rho_w \cdot R \cdot T \cdot D_0 \cdot GF}\right)}{RH} - 1 \right), \quad (1)$$

16 where  $\sigma_{s/a}$  is the surface tension of the solution/air interface ( $0.0718 \text{ N m}^{-1}$  at  $25 \text{ }^\circ\text{C}$ ),  $M_w$  is the  
 17 molecular weight of water ( $18 \text{ g mol}^{-1}$ ),  $\rho_w$  is the density of water ( $1.0 \text{ g cm}^{-3}$ ),  $R$  is the universal  
 18 gas constant ( $8.31 \text{ J K}^{-1} \text{ mol}^{-1}$ ) and  $T$  is temperature ( $298 \text{ K}$ ). The calculated  $\kappa$  [results for our](#)  
 19 [HTDMA measurements](#) are summarized in Figure 3 and Table 2. [It is worth noting that](#)  $\kappa$  is  
 20 related with molar volume of water soluble compounds ( $M_s/\rho_s$ ), which is calculated from both  
 21 the molecular weight ( $M_s$ ) and density ( $\rho_s$ ) by the following equation (Rose et al., 2008):

$$22 \quad \kappa = i_s \frac{\rho_s M_w}{\rho_w M_s}, \quad (2)$$

1 where  $i$  is van't Hoff factor. [This equation \(2\) was mainly employed to derive  \$\kappa\$  from the](#)  
2 [experimental data of Asa-Awuku et al. \(2008\), which has calculated the mean molar volume of](#)  
3 [WSOM extracted from biomass burning particles with a CCN measurement.](#)

4 The range of  $\kappa$  for peat burning particles in Riau (sampled from burnt areas) is 0.02 to  
5 0.04, while that for Central Kalimantan samples is 0.05 to 0.06 (100 nm). These values may be  
6 compared with CCN activity of peat burning particles reported by Dusek et al. (2005). Based on  
7 the experimental data by Dusek et al. (2005), the critical supersaturation for CCN activation of  
8 Indonesian peat burning particles is derived as 0.53% for 100 nm particles. This value can be  
9 converted to  $\kappa$  of 0.05, which is very similar to the values summarized in Figure 3 and Table 2.  
10 The consistently low values of  $\kappa$  suggest that water uptake by freshly emitted peat burning  
11 particles is minimal. The range of  $\kappa$  observed for acacia and fern burning particles ( $\kappa = 0.04$ – $0.08$ )  
12 is comparable to that observed for less hygroscopic mode by previous laboratory experiments on  
13 biomass burning particles (Carrico et al., 2010).

14 The values of  $\kappa$  observed for water extracts ( $A_0$ ) span from 0.11 (acacia, 100 nm) to 0.18  
15 (peat sampled from a burnt area, Riau-4, 100 nm) (Figure 4 and Table 2). The  $\kappa$  value for peat  
16 burning particles ( $A_0$ ) is significantly higher than those emitted from the acacia and fern leaves,  
17 highlighting the importance of understanding hygroscopicity of WSOM as well as water soluble  
18 fraction in quantitatively understanding water uptake properties. The value of  $\kappa$  for acacia  
19 burning particles is similar to that was measured for WSOM extracted from a prescribed forest  
20 fire experiment in Georgia (USA) ( $\kappa = 0.10$ ), which was estimated from a molar volume of  $1.6 \times$   
21  $10^{-4} \text{ m}^3 \text{ mol}^{-1}$  (Asa-Awuku et al., 2008).

22 The  $\kappa$  values for  $A_I$  are higher than those for  $A_0$ . Namely,  $\kappa$  observed for  $A_I$  were 0.30  
23 (peat sampled from a burnt area, Riau-4), 0.24 (acacia), and 0.18 (fern), respectively. [Although it](#)  
24 [is the first hygroscopic measurement for WSOM classified with 1-octanol-water liquid-liquid](#)  
25 [extraction technique, the value could be compared with those for hydrophilic fractions classified](#)  
26 [by XAD-8 column.](#) Kuwata and Lee (2017) demonstrated that classification of WSOM by XAD-  
27 8 column, which is one of the most frequently used materials for solid phase extraction of  
28 WSOM, has a strong relationship with 1-octanol-water partitioning coefficient ( $K_{OW}$ ). Namely,  
29 XAD-8 column selectively traps hydrophobic chemical species in WSOM, which tend to  
30 partition to 1-octanol phase ( $K_{OW} > 1$ ). Thus, hydrophilic fraction separated by XAD-8 is  
31 dominantly composed of chemical species, which has  $K_{OW} < 1$ . The WSOM in  $A_I$  is also

1 dominantly composed of organic compounds with lower values of  $K_{OW}$  ( $K_{OW} < 1$ ), suggesting  
2 that  $A_I$  and WSOM classified by XAD-8 are comparable. The  $\kappa$  value of biomass burning  
3 WSOM separated by XAD-8 is estimated as 0.29, using molar volume ( $6.2 \times 10^{-5} \text{ m}^3 \text{ mol}^{-1}$ )  
4 estimated from a CCN measurement by Asa-Awuku et al. (2008). The comparison provides a  
5 typical range of  $\kappa$  for hydrophilic ( $K_{OW} < 1$ ) fraction of WSOM emitted from biomass burning as  
6 0.2~0.3. [Our results of water uptake by organic compounds \(e.g., bulk organic material, bulk](#)  
7 [WSOM, and highly hydrophilic WSOM\) would be further employed to verify a theoretical](#)  
8 [framework, which uses distributions of water solubility as input parameters \(Riipinen et al.,](#)  
9 [2015\).](#)

### 10 3.3. $\kappa$ (online) and WSOC/OC

11 WSOC/OC ratios of Indonesian peat and vegetation burning particles are summarized in  
12 Table 3. In general, WSOC/OC ratios for peat burning particles from the burnt area in Riau are  
13 small, ranging from 0.93% to 1.80%. Particles emitted from combustion of peat collected in  
14 other areas tend to contain higher fractions of WSOC (WSOC/OC = 2.03–6.08%). The  
15 variability in WSOC/OC ratio could be due to differences in chemical composition of peat  
16 sampled at different areas (Hikmatullah and Sukarman, 2014). These values are an order of  
17 magnitude lower than the experimental data by Iinuma et al. (2007), which reported WSOC/OC  
18 ratio for Indonesian peat burning particles from South Sumatra as 39%. The significant  
19 difference in WSOC/OC ratio could be stemmed from the variations in chemical compositions of  
20 peat as well as combustion conditions. Both a systematic laboratory experiment and chemical  
21 analysis of freshly emitted peat burning particles are needed to address the difference in the data.  
22 The WSOC fractions for acacia and fern burning particles were relatively higher (WSOC/OC =  
23 3.42–6.56%) than those from peat combustion.

24 Figure 5 compares  $\kappa$  and WSOC/OC ratios.  $\kappa$  and WSOC/OC correlate to some extent ( $R$   
25 = 0.65), although the variation ranges for both variables are small. Fern burning particles contain  
26 significantly higher fraction of WSOM than other samples, providing an explanation for higher  $\kappa$   
27 value for fern burning particles. Nevertheless, the correlation between these two parameters is  
28 not tight. This result suggests that other factors, such as chemical composition and hygroscopic

1 property of water soluble fraction, should also be considered to quantitatively understand water  
2 uptake property.

### 3 **3.4. $\kappa$ and OM mass spectra**

4 Figure 6 shows the ToF-ACSM mass spectra for online,  $A_0$ , and  $A_I$  particles, including  
5 those from peat (sampled at a burnt area, Riau-4), acacia and fern burning. The online mass  
6 spectra have intense signals at  $m/z$  41 ( $C_3H_5^+$ ), 43 (most likely  $C_3H_7^+$ ), 55 ( $C_4H_7^+$ ) and 57 ( $C_4H_9^+$ ),  
7 suggesting that these particles are highly hydrogenated (Canagaratna et al., 2015). On the other  
8 hand, fractions of ions at  $m/z$  44 ( $f_{44}$ , mostly  $CO_2^+$ ) are limited ( $f_{44} < 0.02$ ), especially for peat  
9 burning particles. This result signifies that the freshly emitted Indonesian biomass burning  
10 particles, especially those from peat, are not highly oxygenated (Ng et al., 2011). This is in  
11 accordance with a previous study, which showed that  $f_{44}$  values for primary hydrocarbon-like  
12 organic compounds are usually less than 0.05 (Ng et al., 2011). In addition,  $m/z$  60 and  $m/z$  73  
13 (mainly from  $C_2H_4O_2^+$  and  $C_3H_5O_2^+$ , respectively), marker ions of levoglucosan-like species (a  
14 tracer for cellulose in biomass burning particles) (Simoneit et al., 1999; Cubison et al., 2011),  
15 were especially pronounced for fern burning particles. ~~These results are also supported by  
16 functional group analysis by proton nuclear magnetic resonance ( $^1H$  NMR) technique, which  
17 contains strong signals originated from levoglucosan-like species (Lee et al., in preparation).~~

18 The mass spectra of  $A_0$  are significantly different from those of online measurements. The  
19 most abundant ion in the mass spectra of  $A_0$  is  $m/z$  44. Hydrocarbon peaks, such as  $m/z$  41, 43, 55,  
20 and 57, are still significant, yet less abundant than those of the online measurements. In addition,  
21 contributions of  $m/z$  60 and 73 are also enhanced. These results consistently support the idea that  
22  $A_0$  fraction is highly oxygenated. Especially,  $A_0$  fraction for peat burning particles is much more  
23 oxidized than those of fern and acacia samples.

24 The mass spectra of  $A_I$  from acacia and fern burning show that the  $A_I$  fraction is more  
25 oxidized than  $A_0$ , as indicated by higher values of  $f_{44}$ . For instance,  $f_{44}$  of  $A_I$  from fern burning  
26 particles is 0.08, while that of  $A_0$  is 0.05. Another notable characteristic of  $A_I$  mass spectra is the  
27 smaller fraction of high molecular weight (HMW) ions, which is observed for the region of  $m/z >$   
28 100. The HMW fractions ( $f_{HMW}$ ) for  $A_0$  and  $A_I$  are 15.8% and 16.0% (peat sampled at a burnt area,  
29 Riau-4), 21.8% and 11.6% (acacia), and 17.4% and 8.2% (fern), which are significantly lower

1 than the corresponding values for online measurements (Table 3). These results suggest that  $A_I$   
2 contains lower fractions of high molecular weight species, although decomposition during  
3 ionization process makes the estimation of actual contributions of these compounds difficult.

4 Figure 7 displays  $f_{44}$ ,  $f_{60}$ , and mean  $\kappa$  for different types of Indonesian biomass burning  
5 particles. The data points in Figure 7 distribute to two different regions. Low  $f_{44}$  and  $f_{60}$  values are  
6 observed for particles emitted from Sumatran peat burning (i.e., Riau-1, -2, -3, -4). The  $f_{44}$  of  
7 acacia burning particles is slightly higher but  $f_{60}$  is low. By contrast, distinctly higher  $f_{44}$  and  $f_{60}$   
8 are observed for fern, undisturbed peat (Riau), and peat (Central Kalimantan) burning particles.  
9 This is also in accordance with [the proton nuclear magnetic resonance \( \$^1\text{H}\$  NMR\)  \$^1\text{H}\$  NMR](#)  
10 analysis, which suggests that functional group distributions of peat and acacia burning particles  
11 are significantly different from that emitted from fern burning particles. [Namely, the peat and](#)  
12 [acacia samples contain a significantly higher fraction of saturated aliphatic group \(i.e., H-C;](#)  
13 [71.7 % for peat, and 64.0 % for acacia\) in comparison to that of the fern sample \(38.6 %, see](#)  
14 [panel \(a\) of Figure S4\), which readily prohibits the bulk hygroscopic growth of fresh peat](#)  
15 [burning particles. Besides, the highly polar structure \(i.e., H-C-O\) in the peat \(6.0 %\) and acacia](#)  
16 [\(8.1 %\) samples is distinctly lower than that in the fern sample \(15.5 %, Figure S3S4\(a\)\). This](#)  
17 [likely contributes to t](#)The higher WSOC fraction ~~and  $\kappa$~~  of fern burning particles, [and the](#)  
18 [corresponding higher  \$\kappa\$  values](#) could be related with the higher  $f_{44}$  and  $f_{60}$ .

19 Figure 8 ~~shows a correlation of~~ [correlates correlation of](#)  $\kappa$  with  $f_{44}$  for both online (i.e., bulk organic  
20 matter) and offline (i.e., bulk WSOM and highly hydrophilic WSOM fraction) measurements of  
21 peat sampled at a burnt area (Riau-4), acacia and fern burning particles. Similar correlations for  
22 all the biomass burning samples are displayed in Figure [S4-S5](#) of the supplementary material.  
23 The correlation of these two variables is represented as  $\kappa = 2.31 \times f_{44} + 0.02$  ( $R = 0.89$ ). The  
24 slope is very close to that reported for the relationship between the hygroscopicity of organics  
25 ( $\kappa_{org}$ ) and  $f_{44}$  ( $\kappa_{org} = 2.2 \times f_{44} - 0.13$ , Duplissy et al., 2011). The correlation demonstrates that  
26 the degree of oxidation, which is represented by  $f_{44}$ , is the key controlling parameter in  
27 determining hygroscopicity of Indonesian peatland burning particles. As discussed above,  $f_{44}$  of  
28 peat burning particles (Riau-4) is extremely small (Table 3). Minimal water uptake by peat  
29 burning particles (Riau-4) could be associated with low water-soluble fraction (Table 3),  
30 considering that both  $\kappa$  and  $f_{44}$  for the corresponding  $A_0$  or  $A_I$  sample are high. [One notable](#)

1 difference of the correlation found in this work from previous studies is the inclusion of highly  
2 soluble fraction to the analysis. Although the  $\kappa - f_{44}$  correlations have been related to enhanced  
3 water solubility, the relationships among these three parameters (i.e.,  $\kappa$ ,  $f_{44}$ , and water solubility)  
4 have not been shown prior to this study.

5 The correlation shown in Figure 8 has a significant divergence, especially at the region  
6 for high  $f_{44}$  and  $\kappa$  values (upper right corner of the figure), suggesting that degree of oxidation is  
7 not the only one parameter, which controls water uptake property. Especially, comparison of  $A_0$   
8 and  $A_I$  for peat burning particles highlights the limitation of correlating  $f_{44}$  and  $\kappa$ . The values of  
9  $f_{44}$  for these two fractions are almost the same, while  $\kappa$  for  $A_I$  is significantly higher than that for  
10  $A_0$ . As discussed in section 3.2, the difference of  $A_0$  and  $A_I$  could be related to that of  
11 hydrophobic and hydrophilic WSOM separated by XAD-8 (Graber and Rudich, 2006; Sullivan  
12 and Weber, 2006). The hydrophobic fraction separated by XAD-8 is typically considered as  
13 humic-like substances (HULIS), which has high molecular weight (e.g., fulvic and humic acids,  
14 Gysel et al., 2004; Graber and Rudich, 2006; Fan et al., 2013). These results suggest that  
15 quantification of HULIS as well as evaluation of their water uptake property will be important  
16 for understanding hygroscopicity of biomass burning particles, including those emitted from  
17 Indonesian peatland fires.

18 The present study demonstrates the importance of water-soluble organic fraction, which  
19 includes highly soluble one, in quantifying the hygroscopic growth of freshly emitted biomass  
20 burning particles. Addition of these different water-soluble organic fractions could provide an  
21 accurate estimation on hygroscopic growth, which is based on theoretical background. Only size-  
22 unresolved bulk chemical data were employed for the present study. However, chemical  
23 characteristics of actual atmospheric particles could depend on both particle size and mixing  
24 state. These factors would also need to be considered in applying the laboratory data to future  
25 studies.

#### 27 **4. Conclusions**

1 Hygroscopic growth of freshly emitted Indonesian biomass burning particles was  
2 investigated in laboratory using the humidified tandem differential mobility analyzer (RH =  
3 90%). The biomass samples included peat, fern, and acacia leaves collected at Riau and Central  
4 Kalimantan in Indonesia. Hygroscopicity was measured for the freshly emitted particles (online),  
5 bulk water-soluble fraction ( $A_0$ ), and highly water-soluble fraction (i.e., fraction with lower  $K_{OW}$   
6 values) classified by the 1-octanol-water partitioning method ( $A_I$ ). Hygroscopicity parameter  $\kappa$   
7 was derived from the growth factor data. Chemical compositions of these particles were also  
8 quantified using both online and offline techniques.

9 Hygroscopicity of fresh Indonesian peat burning particles is highly dependent on the  
10 origin and condition (e.g., pristine and disturbed) of peat. Particles emitted from combustion of  
11 disturbed peat in Riau were nearly non-hygroscopic (mean  $\kappa = 0.02$ – $0.04$ ), while those from  
12 undisturbed areas were more hygroscopic ( $\kappa = 0.03$ – $0.05$ ). Particles emitted from Central  
13 Kalimantan peat samples were generally more hygroscopic ( $\kappa = 0.05$ – $0.06$ ) than those from Riau.  
14 For biomass samples, acacia burning particles were slightly hygroscopic ( $\kappa = 0.03$ – $0.04$ ), and  
15 fern burning particles were the most hygroscopic ( $\kappa = 0.04$ – $0.09$ ) among all samples. These  
16 values loosely correlated with ratio of WSOC to OC ( $R = 0.65$ ). This result suggests that WSOC  
17 fraction could play an important role in determining  $\kappa$ , yet other factors, such as difference in  
18 hygroscopicity of slightly and highly water-soluble fractions, should also be considered.

19 Hygroscopicity data of  $A_0$  and  $A_I$  fractions were significantly different from those of  
20 online measurements. The values of  $\kappa$  for  $A_0$  were 0.17–0.20 (Riau disturbed peat), 0.09–0.14  
21 (acacia), and 0.10–0.16 (fern). These values were even higher for  $A_I$  ( $\kappa = 0.26$ – $0.31$  for Riau  
22 disturbed peat,  $\kappa = 0.19$ – $0.24$  for acacia, and  $\kappa = 0.16$ – $0.20$  for fern). These results demonstrate  
23 that the low hygroscopicity of Riau peat burning particles (online) is due to small water soluble  
24 fraction.

25 The variation in  $\kappa$  was related with aerosol mass spectra of organics.  $f_{44}$ , which is an  
26 indicator for degree of oxygenation, correlated well with  $\kappa$  ( $R = 0.89$ ), demonstrating that  
27 oxygenated functional groups are important for water uptake. In addition, comparison of  $A_0$  and  
28  $A_I$  data suggested the importance of high molecular weight species, such as humic-like  
29 substances, in determining the magnitude of hygroscopicity for water soluble fraction.



1 Our experimental results are consistent with previous laboratory studies, which reported  
2 insignificant water uptake by fresh Indonesian peat burning particle (Chand et al., 2005; Dusek et  
3 al, 2005). On the contrary, Gras et al. (1999) showed that particles observed in wildfire plume  
4 from Kalimantan were hygroscopic. The differences between field observation and laboratory  
5 experiments could be caused by atmospheric processes (e.g., secondary formation and chemical  
6 aging of particles), and likely resulted from the differences of burnt materials, their origins and  
7 combustion conditions in practical situations as well. In the future, observations of both chemical  
8 composition and hygroscopic growth of particles emitted from peatland fires need to be  
9 conducted both at vicinity and downstream regions to address the question. The last but not the  
10 least, our results can provide an experimentally validated reference for organics-dominated  
11 particle hygroscopicity, thus lowering uncertainties in current climate models and contributing to  
12 more accurate estimations of climate impacts caused by Indonesian peatland burning particles in  
13 both regional and global scales.~~results obtained from this work can be further developed and~~  
14 ~~applied for modeling studies, improving estimation of aerosol radiative forcing introduced by~~  
15 ~~Indonesian peat burning particles in both regional and global scales.~~

## 17 **Acknowledgements**

18 This work was supported by the Singapore National Research Foundation (NRF) under its  
19 Singapore National Research Fellowship scheme (National Research Fellow Award,  
20 NRF2012NRF-NRFF001-031), the Earth Observatory of Singapore, and Nanyang Technological  
21 University. M. I. was funded by the Ministry of Education, Culture, Sports, Science, and  
22 Technology for Science Research (15H05625), the Ministry of Environment for Global  
23 Environment Research (4-1504), and Research Institute for Humanity and  
24 Nature (RIHN), Japan. T. M. and Y. K. were supported by the Environment Research and  
25 Technology Development Fund (2-1403) of the Ministry of Environment,  
26 Japan, and the Japan Society for the Promotion of Science (JSPS),  
27 KAKENHI Grant number JP26550021. We acknowledge the help of Harris Gunawan and  
28 Satomi Shiodera in some biomass samples collection in Indonesia. We also thank Gissella B.

1 Lebron for assisting in the laboratory combustion experiments and Pavel Adamek for improving  
2 the English writing.

3

## 1 **References**

- 2 Allan, J. D., Jimenez, J. L., Williams, P. I., Alfarra, M. R., Bower, K. N., Jayne, J. T., Coe, H.,  
3 Worsnop, D. R. (2003). Quantitative sampling using an Aerodyne aerosol mass spectrometer 1.  
4 Techniques of data interpretation and error analysis. *J. Geophys. Res. Atmos.*, 108: 4090.
- 5 Asa-Awuku, A., Sullivan, A. P., Hennigan, C. J., Weber, R. J., Nenes, A. (2008). Investigation  
6 of molar volume and surfactant characteristics of water-soluble organic compounds in biomass  
7 burning aerosol. *Atmos. Chem. Phys.*, 8: 799-812.
- 8 Aswin, U., Hashimoto, Y., Takahashi, H., and Hayasaka, H. (2004). Combustion and thermal  
9 characteristics of peat fire in tropical peatland in Central Kalimantan, Indonesia. *Tropics*, 14: 1-  
10 19.
- 11 [Bougiatioti, A., Bezantakos, S., Stavroulas, I., Kalivitis, N., Kokkalis, P., Biskos, G.,  
12 Mihalopoulos, N., Papayannis, A., and Nenes, A. \(2016\). Biomass-burning impact on CCN  
13 number, hygroscopicity and cloud formation during summertime in the eastern Mediterranean.  
14 \*Atmos. Chem. Phys.\*, 16: 7389-7409.](#)
- 15 Budisulistiorini S. H., Riva, M., Williams, M., Chen, J., Itoh, M., Surratt, J. D., Kuwata, M.  
16 (2017). Light-absorbing brown carbon aerosol constituents from combustion of Indonesian peat  
17 and biomass, *Environ. Sci. & Technol.*, 51, 4415-4423.
- 18 Canagaratna, M. R., Jimenez, J. L., Kroll, J. H., Chen, Q., Kessler, S. H., Massoli, P.,  
19 Hildebrandt Ruiz, L., Fortner, E., Williams, L. R., Wilson, K. R., Surratt, J. D., Donahue, N. M.,  
20 Jayne, J. T., and Worsnop, D. R. (2015). Elemental ratio measurements of organic compounds  
21 using aerosol mass spectrometry: characterization, improved calibration, and implications.  
22 *Atmos. Chem. Phys.*, 15: 253-272.
- 23 Carrico, C. M., Petters, M. D., Kreidenweis, S. M., Sullivan, A. P., McMeeking, G. R., Levin, E.  
24 J. T., Engling, G., Malm, W. C., and Collett Jr., J. L. (2010). Water uptake and chemical  
25 composition of fresh aerosols generated in open burning of biomass. *Atmos. Chem. Phys.*, 10:  
26 5165–5178.
- 27 Carrico, C. M., Petters, M. D., Kreidenweis, S. M., Collett Jr., J. L., Engling, G., Malm, W. C.  
28 (2008). Aerosol hygroscopicity and cloud droplet activation of extracts of filters from biomass  
29 burning experiments. *J. Geophys. Res. Atmos.*, 113: D08206.
- 30 Chan, M. N., Choi, M. Y., Ng, N. L., Chan, C. K. (2005). Hygroscopicity of Water-Soluble  
31 Organic Compounds in Atmospheric Aerosols: Amino Acids and Biomass Burning Derived  
32 Organic Species. *Environ. Sci. & Technol.*, 39: 1555-1562.
- 33 Chand, D., Schmid, O., Gwaze, P., Parmar, R. S., Helas, G., Zeromskiene, K., Wiedensohler, A.,  
34 Massling, A., Andreae, M. O. (2005). Laboratory measurements of smoke optical properties  
35 from the burning of Indonesian peat and other types of biomass. *Geophys. Res. Lett.*, 32: L12819.
- 36 Chen, Q., Ikemori, F., Higo, H., Asakawa, D., and Mochida, M. (2016). Chemical Structural  
37 Characteristics of HULIS and Other Fractionated Organic Matter in Urban Aerosols: Results  
38 from Mass Spectral and FT-IR Analysis. *Environ. Sci. & Technol.*, 50, 1721-1730.
- 39 Chow, J. C., Watson, J. G., Pritchett, L. C., Pierson, W. R., Frazier, C. A., and Purcell, R. G.  
40 (1993): The DRI Thermal/Optical Reflectance carbon analysis system: Description, evaluation  
41 and applications in U.S. air quality studies, *Atmos. Environ.*, 27A, 1185–1201.

1 Crippa, P., Castruccio, S., Archer-Nicholls, S., Lebron, G. B., Kuwata, M., Thota, A., Sumin, S.,  
2 Butt, E., Wiedinmyer, C., Spracklen, D. V. (2016). Population exposure to hazardous air quality  
3 due to the 2015 fires in Equatorial Asia. *Sci. Rep.*, 6: 37074.

4 Cubison, M. J., Ortega, A. M., Hayes, P. L., Farmer, D. K., Day, D., Lechner, M. J., Brune, W.  
5 H., Apel, E., Diskin, G. S., Fisher, J. A., Fuelberg, H. E., Hecobian, A., Knapp, D. J., Mikoviny,  
6 T., Riemer, D., Sachse, G. W., Sessions, W., Weber, R. J., Weinheimer, A. J., Wisthaler, A.,  
7 Jimenez, J. L. (2011). Effects of aging on organic aerosol from open biomass burning smoke in  
8 aircraft and laboratory studies. *Atmos. Chem. Phys.*, 11: 12049-12064.

9 Day, D. E., Hand, J. L., Carrico, C. M., Engling, G., Malm, W. C. (2006). Humidification factors  
10 from laboratory studies of fresh smoke from biomass fuels. *J. Geophys. Res. Atmos.*, 111,  
11 D22202.

12 Decesari, S., Facchini, M. C., Fuzzi, S., Tagliavini, E. (2000). Characterization of water-soluble  
13 organic compounds in atmospheric aerosol: A new approach. *J. Geophys. Res. Atmos.*, 105:  
14 1481-1489.

15 Duplissy, J., DeCarlo, P. F., Dommen, J., Alfarra, M. R., Metzger, A., Barmapadimos, I., Prevot,  
16 A. S. H., Weingartner, E., Tritscher, T., Gysel, M., Aiken, A. C., Jimenez, J. L., Canagaratna, M.  
17 R., Worsnop, D. R., Collins, D. R., Tomlinson, J., Baltensperger, U. (2011). Relating  
18 hygroscopicity and composition of organic aerosol particulate matter. *Atmos. Chem. Phys.*, 11:  
19 1155-1165.

20 Duplissy, J., Gysel, M., Sjogren, S., Meyer, N., Good, N., Kammermann, L., Michaud, V.,  
21 Weigel, R., Martins dos Santos, S., Gruening, C., Villani, P., Laj, P., Sellegri, K., Metzger, A.,  
22 McFiggans, G. B., Wehrle, G., Richter, R., Dommen, J., Ristovski, Z., Baltensperger, U.,  
23 Weingartner, E. (2009). Intercomparison study of six HTDMAs: results and recommendations.  
24 *Atmos. Meas. Tech.*, 2: 363–378.

25 Dusek, U., Frank, G. P., Helas, G., Iinuma, Y., Zeromskiene, K., Gwaze, P., Hennig, T.,  
26 Massling, A., Schmid, O., Herrmann, H., Wiedensohler, A., Andreae, M. O. (2005). “Missing”  
27 cloud condensation nuclei in peat smoke. *Geophys. Res. Lett.*, 32: L11802.

28 Dusek, U., Frank, G. P., Massling, A., Zeromskiene, K., Iinuma, Y., Schmid, O., Helas, G.,  
29 Hennig, T., Wiedensohler, A., Andreae, M. O. (2011). Water uptake by biomass burning aerosol  
30 at sub- and supersaturated conditions: closure studies and implications for the role of organics.  
31 *Atmos. Chem. Phys.*, 11: 9519-9532.

32 Fan, X., Song, J., Peng, P. (2013). Comparative study for separation of atmospheric humic-like  
33 substance (HULIS) by ENVI-18, HLB, XAD-8 and DEAE sorbents: Elemental composition, FT-  
34 IR, <sup>1</sup>H NMR and off-line thermochemolysis with tetramethylammonium hydroxide (TMAH).  
35 *Chemosphere*, 93: 1710-1719.

36 Fröhlich, R., Cubison, M. J., Slowik, J. G., Bukowiecki, N., Prévôt, A. S. H., Baltensperger, U.,  
37 Schneider, J., Kimmel, J. R., Gonin, M., Rohner, U., Worsnop, D. R., Jayne, J. T. (2013). The  
38 ToF-ACSM: a portable aerosol chemical speciation monitor with TOFMS detection. *Atmos.*  
39 *Meas. Tech.*, 6: 3225-3241.

40 Graber, E. R., and Rudich, Y. (2006). Atmospheric HULIS: How humic-like are they? A  
41 comprehensive and critical review. *Atmos. Chem. Phys.* 6: 729-753.

1 Graham, B., Mayol-Bracero, O. L., Guyon, P., Roberts, G. C., Decesari, S., Facchini, M. C.,  
2 Artaxo, P., Maenhaut, W., Köll, P., Andreae, M. O. (2002). Water-soluble organic compounds in  
3 biomass burning aerosols over Amazonia 1. Characterization by NMR and GC-MS. *J. Geophys.*  
4 *Res. Atmos.*, 107: 8047.

5 Gras, J. L., Jensen, J. B., Okada, K., Ikegami, M., Zaizen, Y., Makino, Y. (1999). Some optical  
6 properties of smoke aerosol in Indonesia and tropical Australia. *Geophys. Res. Lett.*, 26: 1393-  
7 1396.

8 Gysel, M., Crosier, J., Topping, D. O., Whitehead, J. D., Bower, K. N., Cubison, M. J., Williams,  
9 P. I., Flynn, M. J., McFiggans, G. B., Coe, H. (2007). Closure study between chemical  
10 composition and hygroscopic growth of aerosol particles during TORCH2. *Atmos. Chem. Phys.*,  
11 7: 6131-6144.

12 Gysel, M., McFiggans, G. B., Coe, H. (2009). Inversion of tandem differential mobility analyser  
13 (TDMA) measurements. *J. Aerosol Sci.*, 40: 134-151.

14 Gysel, M., Weingartner, E., Nyeki, S., Paulsen, D., Baltensperger, U., Galambos, I., Kiss, G.  
15 (2004). Hygroscopic properties of water-soluble matter and humic-like organics in atmospheric  
16 fine aerosol. *Atmos. Chem. Phys.*, 4(1): 35-50.

17 Hawkins, L. N. and Russell, L. M. (2010). Oxidation of ketone groups in transported biomass  
18 burning aerosol from the 2008 Northern California Lightning Series fires, *Atmos. Environ.*, 44,  
19 4142-4154.

20 Hikmatullah and Sukarman. (2014). Physical and Chemical Properties of Cultivated Peat Soils in  
21 Four Trial Sites of ICCTF in Kalimantan and Sumatra, Indonesia. *J. Trop Soils*, 19: 131-141.

22 Iinuma, Y., Brüggemann, E., Gnauk, T., Müller, K., Andreae, M. O., Helas, G., Parmar, R., and  
23 Herrmann, H. (2007), Source characterization of biomass burning particles: The combustion of  
24 selected European conifers, African hardwood, savanna grass, and German and Indonesian peat,  
25 *J. Geophys. Res.*, 112, D08209.

26 Jimenez, J. L., Canagaratna, M. R., Donahue, N. M., Prevot, A. S. H., Zhang, Q., Kroll, J. H.,  
27 DeCarlo, P. F., Allan, J. D., Coe, H., Ng, N. L., Aiken, A. C., Docherty, K. S., Ulbrich, I. M.,  
28 Grieshop, A. P., Robinson, A. L., Duplissy, J., Smith, J. D., Wilson, K. R., Lanz, V. A., Hueglin,  
29 C., Sun, Y. L., Tian, J., Laaksonen, A., Raatikainen, T., Rautiainen, J., Vaattovaara, P., Ehn, M.,  
30 Kulmala, M., Tomlinson, J. M., Collins, D. R., Cubison, M. J., Dunlea, J., Huffman, J. A.,  
31 Onasch, T. B., Alfarra, M. R., Williams, P. I., Bower, K., Kondo, Y., Schneider, J., Drewnick, F.,  
32 Borrmann, S., Weimer, S., Demerjian, K., Salcedo, D., Cottrell, L., Griffin, R., Takami, A.,  
33 Miyoshi, T., Hatakeyama, S., Shimono, A., Sun, J. Y, Zhang, Y. M., Dzepina, K., Kimmel, J. R.,  
34 Sueper, D., Jayne, J. T., Herndon, S. C., Trimborn, A. M., Williams, L. R., Wood, E. C.,  
35 Middlebrook, A. M., Kolb, C. E., Baltensperger, U., Worsnop, D. R. (2009). Evolution of  
36 Organic Aerosols in the Atmosphere. *Science*, 326: 1525-1529.

37 Koplitz, S. N., Mickley, L. J., Marlier, M. E., Buonocore, J. J., Kim, P. S., Liu T., Sulprizio, M.  
38 P., DeFries, R. S., Jacob, D. J., Schwartz, J., Pongsiri, M., Myers, S. S. (2016). Public health  
39 impacts of the severe haze in Equatorial Asia in September–October 2015: demonstration of a  
40 new framework for informing fire management strategies to reduce downwind smoke exposure.  
41 *Environ. Res. Lett.*, 11: 094023.

- 1 Kunii, O., Kanagawa, S., Yajima, I., Hisamatsu, Y., Yamamura, S., Amagai, T., Ismail, Ir T. S.  
2 (2002). The 1997 Haze Disaster in Indonesia: Its Air Quality and Health Effects. Archives of  
3 Environmental Health: An International Journal, 57: 16-22.
- 4 Kuwata, M., Kai, F. M., Yang, L., Itoh, M., Gunawan, H., and Harvey, C. F. (2017).  
5 Temperature and Burning History Affect Emissions of Greenhouse Gasses and Aerosol Particles  
6 from Tropical Peatland Fire. J. Geophys. Res. Atmos., 121: 1281-1292.
- 7 Kuwata, M. and Lee, W.-C. (2017). 1-Octanol-Water Partitioning as a Classifier of Water  
8 Soluble Organic Materials: Implication for Solubility Distribution. Aerosol Sci. Technol., 51:  
9 602-613.
- 10 Levine, J. S. (1999). The 1997 fires in Kalimantan and Sumatra, Indonesia: Gaseous and  
11 particulate emissions. Geophys. Res. Lett., 26: 815-818.
- 12 Marlier, M. E., DeFries, R. S., Voulgarakis, A., Kinney, P. L., Randerson, J. T., Shindell, D. T.,  
13 Chen, Y., Faluvegi, G. (2013). El Niño and health risks from landscape fire emissions in  
14 southeast Asia. Nat. Clim. Change, 3: 131-136.
- 15 Marlier, M. E., DeFries, R. S., Kim, P. S., Gaveau, D. L. A., Koplitz, S. N., Jacob, D. J., Mickley,  
16 L. J., Margono, B. A., Myers, S. S. (2015). Fire emissions and regional air quality impacts from  
17 fires in oil palm, timber, and logging concessions in Indonesia. Environ. Res. Lett., 10: 085005.
- 18 Massling, A., Leinert, S., Wiedensohler, A., Covert, D. (2007). Hygroscopic growth of sub-  
19 micrometer and one-micrometer aerosol particles measured during ACE-Asia. Atmos. Chem.  
20 Phys., 7: 3249-3259.
- 21 Massling, A., Wiedensohler, A., Busch, B., Neusüß, C., Quinn, P., Bates, T., and Covert, D.  
22 (2003). Hygroscopic properties of different aerosol types over the Atlantic and Indian Oceans,  
23 Atmos. Chem. Phys., 3, 1377-1397.
- 24 Mayol-Bracero, O. L., Guyon, P., Graham, B., Roberts, G., Andreae, M. O., Decesari, S.,  
25 Facchini, M. C., Fuzzi, S., Artaxo, P. (2002). Water-soluble organic compounds in biomass  
26 burning aerosols over Amazonia 2. Apportionment of the chemical composition and importance  
27 of the polyacidic fraction. J. Geophys. Res. Atmos., 107: 8291.
- 28 [Mircea, M., Facchini, M. C., Decesari, S., Cavalli, F., Emblico, L., Fuzzi, S., Vestin, A., Rissler,  
29 J., Swietlicki, E., Frank, G., Andreae, M. O., Maenhaut, W., Rudich, Y., and Artaxo, P. \(2005\).  
30 Importance of the organic aerosol fraction for modeling aerosol hygroscopic growth and  
31 activation: a case study in the Amazon Basin. Atmos. Chem. Phys., 5: 3111-3126.](#)
- 32 Mochida, M. and Kawamura, K. (2004). Hygroscopic properties of levoglucosan and related  
33 organic compounds characteristic to biomass burning aerosol particles. J. Geophys. Res. Atmos.,  
34 109, D21202.
- 35 Narukawa, M., Kawamura, K., Takeuchi, N., Nakajima, T. (1999). Distribution of dicarboxylic  
36 acids and carbon isotopic compositions in aerosols from 1997 Indonesian forest fires. Geophys.  
37 Res. Lett., 26: 3101-3104.
- 38 Ng, N. L., Canagaratna, M. R., Jimenez, J. L., Chhabra, P. S., Seinfeld, J. H., and Worsnop, D. R.  
39 (2011). Changes in organic aerosol composition with aging inferred from aerosol mass spectra.  
40 Atmos. Chem. Phys., 11: 6465-6474.

1 Ng, N. L., Canagaratna, M. R., Zhang, Q., Jimenez, J. L., Tian, J., Ulbrich, I. M., Kroll, J. H.,  
2 Docherty, K. S., Chhabra, P. S., Bahreini, R., Murphy, S. M., Seinfeld, J. H., Hildebrandt, L.,  
3 Donahue, N. M., DeCarlo, P. F., Lanz, V. A., Prevot, A. S. H., Dinar, E., Rudich, Y., and  
4 Worsnop, D. R. (2010). Organic aerosol components observed in Northern Hemispheric datasets  
5 from Aerosol Mass Spectrometry, *Atmos. Chem. Phys.*, 10, 4625-4641.

6 Page, S. E., Siegert, F., Rieley, J. O., Boehm, H.-D. V., Jaya, A., Limin, S. (2002). The amount  
7 of carbon released from peat and forest fires in Indonesia during 1997. *Nature*, 420: 61-65.

8 Peng, C., Chan, M. N., and Chan, C. K. (2001). The hygroscopic properties of dicarboxylic and  
9 multifunctional acids: Measurements and UNIFAC predictions, *Environ. Sci. & Technol.*, 35,  
10 4495-4501.

11 Petters, M. D., Carrico, C. M., Kreidenweis, S. M., Prenni, A. J., DeMott, P. J., Collett Jr., J. L.,  
12 and Moosmuller, H. (2009). Cloud condensation nucleation activity of biomass burning aerosol.  
13 *J. Geophys. Res. Atmos.*, 114, D22205.

14 Petters, M. D., and Kreidenweis, S. M. (2007). A single parameter representation of hygroscopic  
15 growth and cloud condensation nucleus activity. *Atmos. Chem. Phys.*, 7: 1961-1971.

16 Petters, M. D., and Kreidenweis, S. M. (2008). A single parameter representation of hygroscopic  
17 growth and cloud condensation nucleus activity – Part 2: Including solubility. *Atmos. Chem.*  
18 *Phys.*, 8: 6273-6279.

19 Petters, M. D., Kreidenweis, S. M., Ziemann, P. J. (2016). Prediction of cloud condensation  
20 nuclei activity for organic compounds using functional group contribution methods. *Geosci.*  
21 *Model Dev.*, 9: 111-124.

22 Polidori, A., Turpin, B. J., Davidson, C. I., Rodenburg, L. A., and Maimone, F. (2008). Organic  
23 PM<sub>2.5</sub>: Fractionation by Polarity, FTIR Spectroscopy, and OM/OC Ratio for the Pittsburgh  
24 Aerosol. *Aerosol Sci. & Technol.* 42: 233-246.

25 Prenni, A. J., DeMott, P. J., Kreidenweis, S. M., Sherman, D. E., Russell, L. M., and Ming, Y.  
26 (2001). The effects of low molecular weight dicarboxylic acids on cloud formation. *J. Phys.*  
27 *Chem. A*, 105:11240-11248.

28 Prenni, A. J., DeMott, P. J., Sullivan, A. P., Sullivan, R. C., Kreidenweis, S. M., Rogers, D. C.  
29 (2012). Biomass burning as a potential source for atmospheric ice nuclei: Western wildfires and  
30 prescribed burns. *Geophys. Res. Lett.*, 39, L11805.

31 Psichoudaki, M. and Pandis, S. N. (2013). Atmospheric Aerosol Water-Soluble Organic Carbon  
32 Measurement: A Theoretical Analysis. *Environ. Sci. & Technol.*, 47: 9791-9798.

33 Reddington, C. L., Yoshioka, M., Balasubramanian, R., Ridley, D., Toh, Y. Y., Arnold, S. R.,  
34 Spracklen, D. V. (2014). Contribution of vegetation and peat fires to particulate air pollution in  
35 Southeast Asia. *Environ. Res. Lett.*, 9: 094006.

36 Riipinen, I., Rastak, N., Pandis, S. N. (2015). Connecting the solubility and CCN activation of  
37 complex organic aerosols: a theoretical study using solubility distributions. *Atmos. Chem. Phys.*,  
38 15: 6305-6322.

39 Rose, D., Gunthe, S. S., Mikhailov, E., Frank, G. P., Dusek, U., Andreae, M. O., and Pöschl, U.  
40 (2008). Calibration and measurement uncertainties of a continuous-flow cloud condensation

1 nuclei counter (DMT-CCNC): CCN activation of ammonium sulfate and sodium chloride  
2 aerosol particles in theory and experiment. *Atmos. Chem. Phys.*, 8: 1153-1179.

3

4 [Rose, D., Nowak, A., Achtert, P., Wiedensohler, A., Hu, M., Shao, M., Zhang, Y., Andreae, M.  
5 O., and Pöschl, U. \(2010\). Cloud condensation nuclei in polluted air and biomass burning smoke  
6 near the mega-city Guangzhou, China – Part 1: Size-resolved measurements and implications for  
7 the modeling of aerosol particle hygroscopicity and CCN activity. \*Atmos. Chem. Phys.\*, 10:  
8 3365-3383.](#)

9 Simoneit, B. R. T., Schauer, J. J., Nolte, C. G., Oros, D. R., Elias, V. O., Fraser, M. P., Rogge, W.  
10 F., Cass, G. R. (1999). Levoglucosan, a tracer for cellulose in biomass burning and atmospheric  
11 particles. *Atmos. Environ.*, 33: 173-182.

12 Spracklen, D.V., Reddington C. L., and Gaveau, D. L. A. (2015). Industrial concessions, fires  
13 and air pollution in Equatorial Asia. *Environ. Res. Lett.*, 10: 091001.

14 Stockwell, C. E., Jayarathne, T., Cochrane, M. A., Ryan, K. C., Putra, E. I., Saharjo, B. H.,  
15 Nurhayati, A. D., Albar, I., Blake, D. R., Simpson, I. J., Stone, E. A., Yokelson, R. J. (2016).  
16 Field measurements of trace gases and aerosols emitted by peat fires in Central Kalimantan,  
17 Indonesia, during the 2015 El Nino. *Atmos. Chem. Phys.*, 16: 11711-11732.

18 Stockwell, C. E., Veres, P. R., Williams, J., and Yokelson, R. J. (2015). Characterization of  
19 biomass burning emissions from cooking fires, peat, crop residue, and other fuels with high-  
20 resolution proton-transfer-reaction time-of-flight mass spectrometry. *Atmos. Chem. Phys.*, 15:  
21 845-865.

22 Suda, S. R., Petters, M. D., Yeh, G. K., Strollo, C., Matsunaga, A., Faulhaber, A., Ziemann, P. J.,  
23 Prenni, A. J., Carrico, C. M., Sullivan, R. C., Kreidenweis, S. M. (2014). Influence of Functional  
24 Groups on Organic Aerosol Cloud Condensation Nucleus Activity. *Environ. Sci. & Technol.*, 48:  
25 10182-10190.

26 Sullivan, A. P., and Weber, R. J. (2006), Chemical characterization of the ambient organic  
27 aerosol soluble in water: 1. Isolation of hydrophobic and hydrophilic fractions with a XAD-8  
28 resin, *J. Geophys. Res.*, 111, D05314.

29 Sullivan, R. C., Moore, M. J. K., Petters, M. D., Kreidenweis, S. M., Roberts, G. C., Prather, K.  
30 A. (2009). Effect of chemical mixing state on the hygroscopicity and cloud nucleation properties  
31 of calcium mineral dust particles. *Atmos. Chem. Phys.*, 9: 3303-3316.

32 Suzuki, Y., Kawakami, M., and Akasaka, K. (2001). <sup>1</sup>H NMR Application for Characterizing  
33 Water-Soluble Organic Compounds in Urban Atmospheric Particles. *Environ. Sci. & Technol.*,  
34 35: 2656-2664.

35 Tagliavini, E., Moretti, F., Decesari, S., Facchini, M. C., Fuzzi, S., Maenhaut, W. (2006).  
36 Functional group analysis by H NMR/chemical derivatization for the characterization of organic  
37 aerosol from the SMOCC field campaign. *Atmos. Chem. Phys.*, 6: 1003-1019.

38 Takegawa, N., Miyakawa, T., Kawamura, K., and Kondo, Y. (2007). Contribution of selected  
39 dicarboxylic and w-oxocarboxylic acids in ambient aerosol to the m/z 44 signal of an Aerodyne  
40 aerosol mass spectrometer, *Aerosol Sci. Technol.*, 41, 418-437.



- 1 Tang, I. N. and Munkelwitz, H. R. (1994). Water activities, densities, and refractive indices of  
2 aqueous sulfates and sodium nitrate droplets of atmospheric importance. *J. Geophys. Res.*  
3 *Atmos.*, 99: 18801-18808.
- 4 Turpin, B. J., Hering, S. V., and Huntzicker, J. J. (1994). Investigation of organic aerosol  
5 sampling artifacts in the Los Angeles Basin, *Atmos. Environ.*, 28, 3061-3071.
- 6 Usup A., Hashimoto, Y., Takahashi, H., and Hayasaka, H. (2004). Combustion and thermal  
7 characteristics of peat fire in tropical peatland in Central Kalimantan, Indonesia. *Tropics*, 14: 1-  
8 19.
- 9 van der Werf, G.R., Randerson, J. T., Giglio, L., Collatz, G. J., Mu, M., Kasibhatla, P. S.,  
10 Morton, D. C., DeFries, R. S., Jin, Y., van Leeuwen, T. T. (2010). Global fire emissions and the  
11 contribution of deforestation, savanna, forest, agricultural, and peat fires (1997–2009). *Atmos.*  
12 *Chem. Phys.*, 10: 11707-11735.
- 13 Valvani, S. C., Yalkowsky, S. H., and Roseman, T. J. (1981). Solubility and partitioning IV:  
14 Aqueous solubility and octanol-water partition coefficients of liquid nonelectrolytes. *J.*  
15 *Pharmaceutical Sci.*, 70: 502-507.
- 16 Wang, Y., Field, R. D., Roswintiarti, O. (2004). Trends in atmospheric haze induced by peat  
17 fires in Sumatra Island, Indonesia and El Niño phenomenon from 1973 to 2003. *Geophys. Res.*  
18 *Lett.*, 31: L04103.
- 19 Yustiawati, Kihara, Y., Sazawa, K., Kuramitz, H., Kurasaki, M., Saito, T., Hosokawa, T., Syawal,  
20 M. S., Wulandari, L., Hendri, I., Tanaka, S. (2015). Effects of peat fires on the characteristics of  
21 humic acid extracted from peat soil in Central Kalimantan, Indonesia. *Environ. Sci. & Pollut.*  
22 *Res.*, 22: 2384-2395.
- 23

1 **Table 1.** Summary of Indonesian peat and biomasses used for the laboratory combustion  
 2 experiments. Samples 9, 15, and 16 were also used for offline experiments of their aqueous  
 3 extracts ( $A_0$  and  $A_I$ ).

| Exp. No. | Sample name     | Sample depth (cm)   | Type /Species              | Location                         | Description              |
|----------|-----------------|---------------------|----------------------------|----------------------------------|--------------------------|
| 1        | Riau-1          | Surface ~ 10        | Peat                       | Riau, Sumatra                    | D&B* peatland            |
| 2        | Riau-1.1        | 10–20               | Peat                       | Riau, Sumatra                    | D&B* peatland            |
| 3        | Riau-1.2        | 30–40               | Peat                       | Riau, Sumatra                    | D&B* peatland            |
| 4        | Riau-2          | Surface ~ 10        | Peat                       | Riau, Sumatra                    | D&B* peatland            |
| 5        | Riau-2.1        | 10–20               | Peat                       | Riau, Sumatra                    | D&B* peatland            |
| 6        | Riau-2.2        | 30–40               | Peat                       | Riau, Sumatra                    | D&B* peatland            |
| 7        | Riau-3          | Surface ~ 10        | Peat                       | Riau, Sumatra                    | D&B* peatland            |
| 8        | Riau-3.1        | 10–20               | Peat                       | Riau, Sumatra                    | D&B* peatland            |
| 9        | <b>Riau-4**</b> | <b>Surface ~ 10</b> | <b>Peat</b>                | <b>Riau, Sumatra</b>             | <b>D&amp;B* peatland</b> |
| 10       | Riau-4.1        | 10–20               | Peat                       | Riau, Sumatra                    | D&B* peatland            |
| 11       | Riau-SF         | Surface ~ 5         | Peat                       | Riau, Sumatra                    | Secondary forest         |
| 12       | Riau-Zam        | Surface ~ 5         | Peat                       | Riau, Sumatra                    | Undisturbed peat forest  |
| 13       | C.K.-DF         | Surface ~ 5         | Peat                       | Palangkaraya, Central Kalimantan | D&UB# peat forest        |
| 14       | C.K.-DB         | Surface ~ 5         | Peat                       | Palangkaraya, Central Kalimantan | D&B* peat forest         |
| 15       | <b>acacia**</b> | N/A                 | <b>Acacia mangium</b>      | <b>Riau, Sumatra</b>             | <b>Dried leaves</b>      |
| 16       | <b>fern**</b>   | N/A                 | <b>Pteridium aquilinum</b> | <b>Riau, Sumatra</b>             | <b>Dried leaves</b>      |

4 \* D&B stands for the drained and burnt condition.

5 # D&UB represents the drained but unburnt case.

6 \*\* Teflon filter samples were collected during online combustion experiments.

1 **Table 2.** Volume weighted mean GF and  $\kappa$  values (average  $\pm$  1 standard deviation, S.D.) of  
 2 different types of Indonesian peat and biomasses. The results of their aqueous extracts ( $A_0$  and  
 3  $A_1$ ) are also shown.

| Sample name |                    | Mean GF (RH = 90%)              |                 |                  | Mean $\kappa$ (RH = 90%) |                   |                   |                   |
|-------------|--------------------|---------------------------------|-----------------|------------------|--------------------------|-------------------|-------------------|-------------------|
|             |                    | 50 nm                           | 100 nm          | 200 nm           | 50 nm                    | 100 nm            | 200 nm            |                   |
| Online      | <b>Sumatra</b>     | Riau-1                          | 1.17 $\pm$ 0.07 | 1.09 $\pm$ 0.06  | 1.04 $\pm$ 0.01          | 0.089 $\pm$ 0.042 | 0.039 $\pm$ 0.028 | 0.016 $\pm$ 0.002 |
|             |                    | Riau-1.1                        | 1.15 $\pm$ 0.06 | 1.05 $\pm$ 0.01  | 1.04 $\pm$ 0.01          | 0.080 $\pm$ 0.036 | 0.021 $\pm$ 0.005 | 0.014 $\pm$ 0.002 |
|             | Riau-1.2           | 1.00 $\pm$ 0.002                | 1.08 $\pm$ 0.04 | 1.06 $\pm$ 0.01  | 0.001 $\pm$ 0.001        | 0.036 $\pm$ 0.017 | 0.025 $\pm$ 0.002 |                   |
|             | Riau-2             | –                               | 1.07 $\pm$ 0.01 | 1.12 $\pm$ 0.06  | –                        | 0.029 $\pm$ 0.005 | 0.052 $\pm$ 0.032 |                   |
|             | Riau-2.1           | 1.06 $\pm$ 0.04                 | 1.06 $\pm$ 0.01 | 1.06 $\pm$ 0.01  | 0.029 $\pm$ 0.019        | 0.023 $\pm$ 0.005 | 0.024 $\pm$ 0.005 |                   |
|             | Riau-2.2           | 1.05 $\pm$ 0.02                 | 1.09 $\pm$ 0.02 | 1.10 $\pm$ 0.02  | 0.024 $\pm$ 0.010        | 0.037 $\pm$ 0.009 | 0.042 $\pm$ 0.009 |                   |
|             | Riau-3             | 1.07 $\pm$ 0.04                 | 1.05 $\pm$ 0.01 | 1.08 $\pm$ 0.01  | 0.035 $\pm$ 0.022        | 0.022 $\pm$ 0.006 | 0.033 $\pm$ 0.006 |                   |
|             | Riau-3.1           | 1.05 $\pm$ 0.02                 | 1.05 $\pm$ 0.02 | 1.08 $\pm$ 0.01  | 0.024 $\pm$ 0.012        | 0.022 $\pm$ 0.010 | 0.031 $\pm$ 0.006 |                   |
|             | Riau-4             | 1.04 $\pm$ 0.01                 | 1.08 $\pm$ 0.01 | 1.05 $\pm$ 0.002 | 0.017 $\pm$ 0.003        | 0.034 $\pm$ 0.003 | 0.019 $\pm$ 0.001 |                   |
|             | Riau-4.1           | 1.07 $\pm$ 0.10                 | 0.99 $\pm$ 0.01 | 1.02 $\pm$ 0.01  | 0.059 $\pm$ 0.063        | N/A               | 0.007 $\pm$ 0.003 |                   |
|             | (Burnt peatland)   | <b>Riau D&amp;B<sup>#</sup></b> | 1.07 $\pm$ 0.04 | 1.06 $\pm$ 0.02  | 1.07 $\pm$ 0.02          | 0.040 $\pm$ 0.023 | 0.029 $\pm$ 0.010 | 0.026 $\pm$ 0.007 |
|             | (Secondary forest) |                                 | Riau-SF         | 1.04 $\pm$ 0.05  | 1.07 $\pm$ 0.004         | 1.09 $\pm$ 0.01   | 0.025 $\pm$ 0.028 | 0.028 $\pm$ 0.002 |
|             | (Undisturbed area) | Riau-Zam                        | 1.10 $\pm$ 0.07 | 1.11 $\pm$ 0.04  | 1.08 $\pm$ 0.004         | 0.053 $\pm$ 0.038 | 0.048 $\pm$ 0.017 | 0.032 $\pm$ 0.002 |
|             | <b>Kalimantan</b>  | C.K.-DF                         | 1.11 $\pm$ 0.06 | 1.13 $\pm$ 0.01  | 1.11 $\pm$ 0.01          | 0.057 $\pm$ 0.033 | 0.058 $\pm$ 0.005 | 0.046 $\pm$ 0.004 |
|             |                    | C.K.-DB                         | 1.11 $\pm$ 0.05 | 1.12 $\pm$ 0.02  | 1.13 $\pm$ 0.01          | 0.055 $\pm$ 0.028 | 0.054 $\pm$ 0.011 | 0.056 $\pm$ 0.005 |
|             | acacia             | 1.05 $\pm$ 0.01                 | 1.09 $\pm$ 0.01 | 1.09 $\pm$ 0.01  | 0.026 $\pm$ 0.005        | 0.039 $\pm$ 0.006 | 0.037 $\pm$ 0.006 |                   |
|             | fern               | 1.08 $\pm$ 0.02                 | 1.17 $\pm$ 0.02 | 1.20 $\pm$ 0.03  | 0.039 $\pm$ 0.011        | 0.078 $\pm$ 0.010 | 0.088 $\pm$ 0.014 |                   |

Aqueous extracts:  $A_0$  (the water extracts),  $A_1$  (the 1-octanol water extracts)

| Sample name |                | Mean GF (RH = 90%) |             |             | Mean $\kappa$ (RH = 90%) |               |               |               |
|-------------|----------------|--------------------|-------------|-------------|--------------------------|---------------|---------------|---------------|
|             |                | 50 nm              | 100 nm      | 200 nm      | 50 nm                    | 100 nm        | 200 nm        |               |
| Offline     | A <sub>0</sub> | peat*              | 1.29 ± 0.05 | 1.34 ± 0.06 | 1.38 ± 0.09              | 0.168 ± 0.039 | 0.179 ± 0.038 | 0.198 ± 0.058 |
|             |                | acacia             | 1.17 ± 0.03 | 1.23 ± 0.04 | 1.28 ± 0.05              | 0.090 ± 0.019 | 0.110 ± 0.025 | 0.135 ± 0.027 |
|             |                | fern               | 1.18 ± 0.03 | 1.28 ± 0.03 | 1.32 ± 0.05              | 0.100 ± 0.016 | 0.141 ± 0.020 | 0.157 ± 0.031 |
|             | A <sub>1</sub> | peat*              | 1.47 ± 0.06 | 1.50 ± 0.09 | 1.47 ± 0.11              | 0.311 ± 0.052 | 0.302 ± 0.074 | 0.262 ± 0.083 |
|             |                | acacia             | 1.32 ± 0.04 | 1.42 ± 0.03 | 1.44 ± 0.07              | 0.195 ± 0.027 | 0.237 ± 0.023 | 0.239 ± 0.049 |
|             |                | fern               | 1.28 ± 0.04 | 1.33 ± 0.05 | 1.39 ± 0.05              | 0.162 ± 0.026 | 0.177 ± 0.034 | 0.205 ± 0.038 |
|             |                |                    |             |             |                          |               |               |               |

- 1 – Data are unavailable due to low particle number concentration.
- 2 # **Riau D&B** represents the averages of all the D&B peat samples collected from different
- 3 depths of the Sumatran peatlands (i.e., samples used for **Exp. 1-10** in Table 1).
- 4 \* **Peat** in Table 2 refers to the Riau-4 sample collected from burnt peatlands in Sumatra (see
- 5 Sect.2 for details).

1 **Table 3.** Summary of chemical characteristics of different types of Indonesian peat and biomass  
 2 burning particles.

| Sample name       |              | Mean $\kappa$ | $f_{44}$ | $f_{HMW}$ | OC     | EC     | WSOC/OC |
|-------------------|--------------|---------------|----------|-----------|--------|--------|---------|
|                   |              | (100 nm)      | (%)      | (%)       | (mg C) | (mg C) | (%)     |
| <b>Sumatra</b>    | Riau-1       | 0.039         | 0.4      | 42.9      | 12.69  | 0.13   | 0.93    |
|                   | Riau-2       | 0.029         | 0.7      | 26.9      | 14.08  | 0.12   | 1.80    |
|                   | Riau-3       | 0.022         | 0.7      | 31.7      | 13.58  | 0.13   | 1.63    |
|                   | Riau-4       | 0.034         | 0.5      | 29.0      | 18.86  | 0.13   | 1.51    |
|                   | Riau-SF      | 0.028         | 1.7      | 21.1      | 7.64   | 0.07   | 4.15    |
|                   | Riau-Zam     | 0.048         | 1.6      | 23.8      | 2.58   | 0.03   | 6.08    |
| <b>Kalimantan</b> | C.K.-DF      | 0.058         | 2.0      | 19.5      | 5.58   | 0.05   | 4.16    |
|                   | C.K.-DB      | 0.054         | 1.9      | 19.3      | 7.51   | 0.05   | 2.03    |
|                   | acacia       | 0.039         | 1.1      | 27.0      | 14.61  | 0.05   | 3.42    |
|                   | fern         | 0.078         | 1.9      | 21.5      | 13.34  | 0.07   | 6.56    |
|                   | <b>peat*</b> | 0.179         | 9.5      | 15.8      | N/A    | N/A    | N/A     |
| <b>A0</b>         | acacia       | 0.110         | 4.7      | 21.8      | N/A    | N/A    | N/A     |
|                   | fern         | 0.141         | 5.2      | 17.4      | N/A    | N/A    | N/A     |
|                   | <b>peat*</b> | 0.302         | 9.3      | 16.0      | N/A    | N/A    | N/A     |
| <b>A1</b>         | acacia       | 0.237         | 6.6      | 11.6      | N/A    | N/A    | N/A     |
|                   | fern         | 0.177         | 7.9      | 8.2       | N/A    | N/A    | N/A     |

3

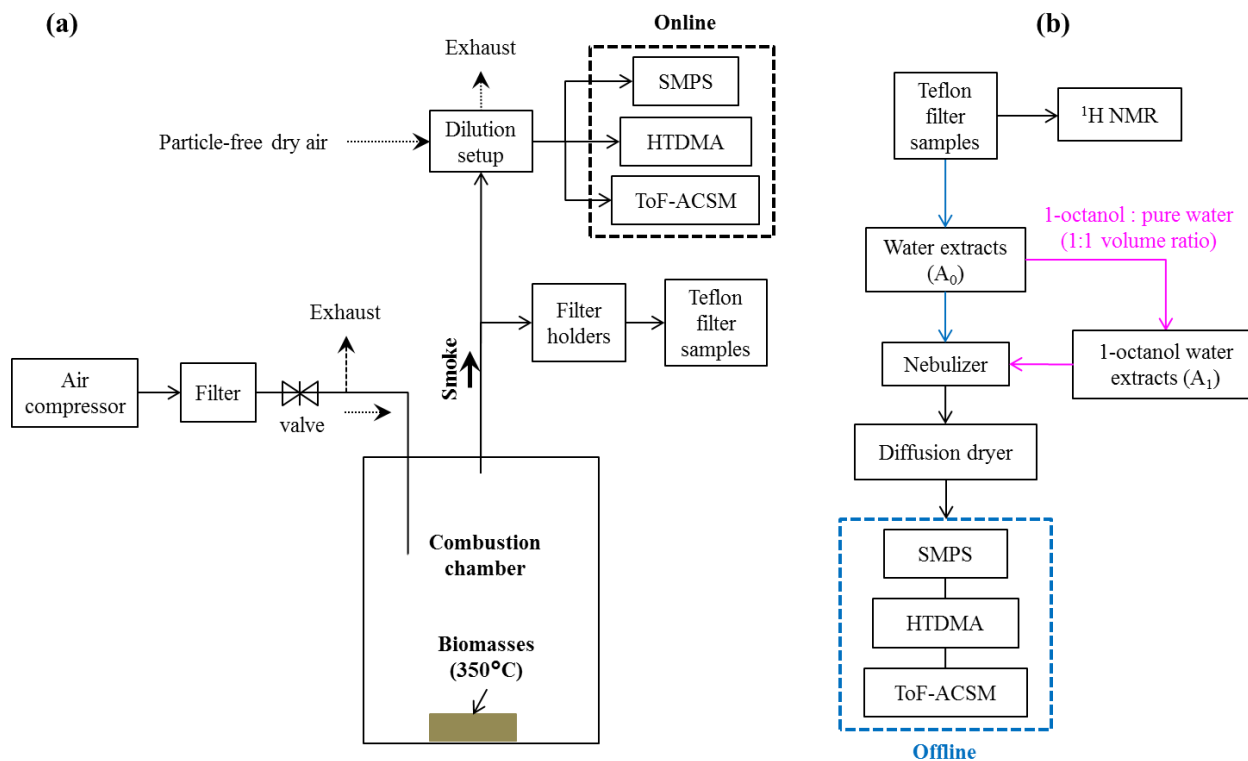

1

2 **Fig. 1** Schematic diagrams of the laboratory experimental setups.

3 (a) The experimental setup for combustion experiment and subsequent online measurements, and

4 (b) experimental setup for offline measurements of water extracts ( $A_0$ , blue arrows) and 1-

5 octanol water extracts ( $A_1$ , magenta arrows) from the filter samples.

6

1

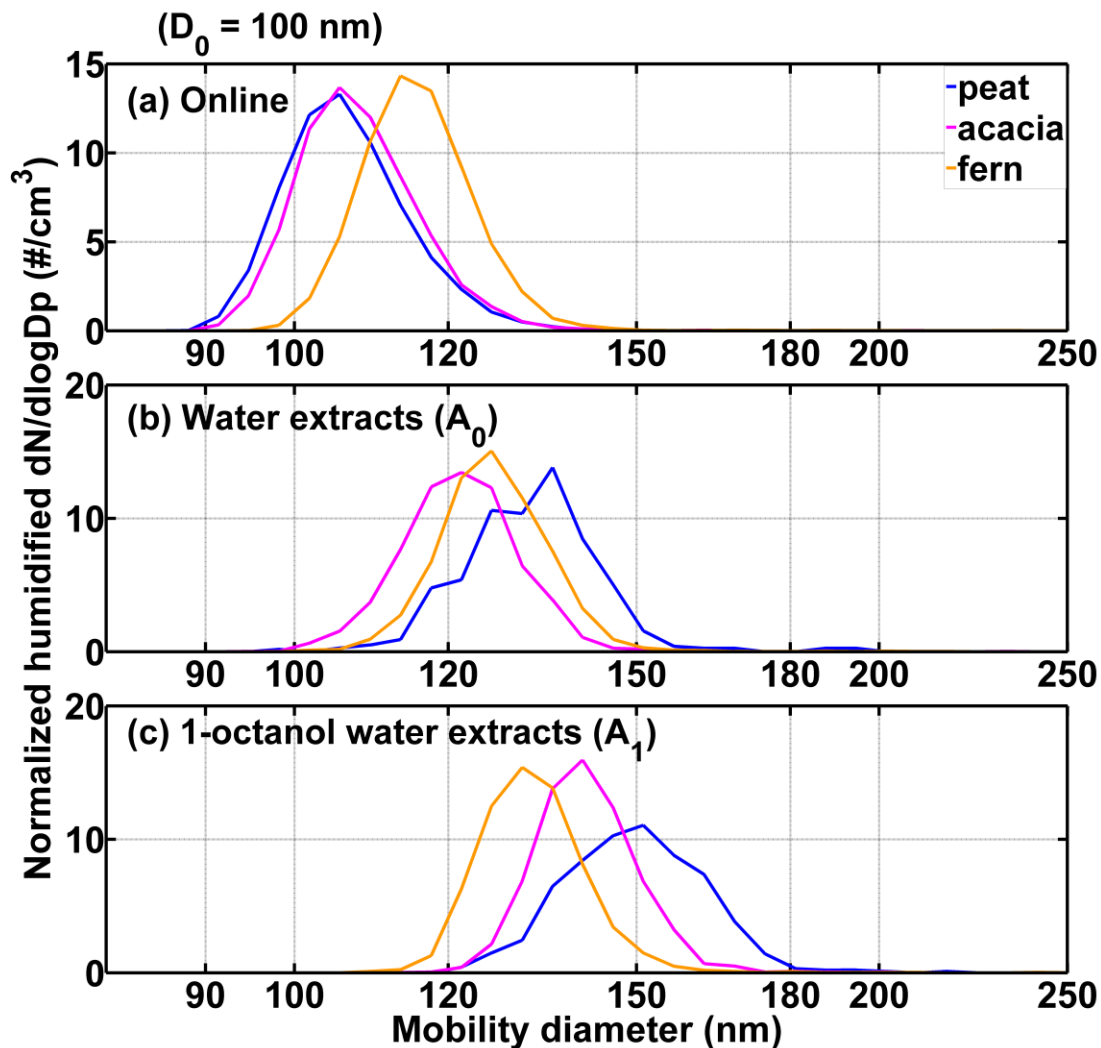

2

3 **Fig.2** Normalized number size distributions measured by the HTDMA ( $D_0 = 100$  nm; RH =  
 4 90%) of peat, fern and acacia burning particles. (a) online data, (b)  $A_0$ , and (c)  $A_1$ . For online data,  
 5 peat burning particles are nearly non-hygroscopic, while fern burning particles are more  
 6 hygroscopic. Aqueous extracts of peat burning particles are the most hygroscopic among the  
 7 three types of biomasses. The x-axis is on a logarithmic scale.

8

9

1

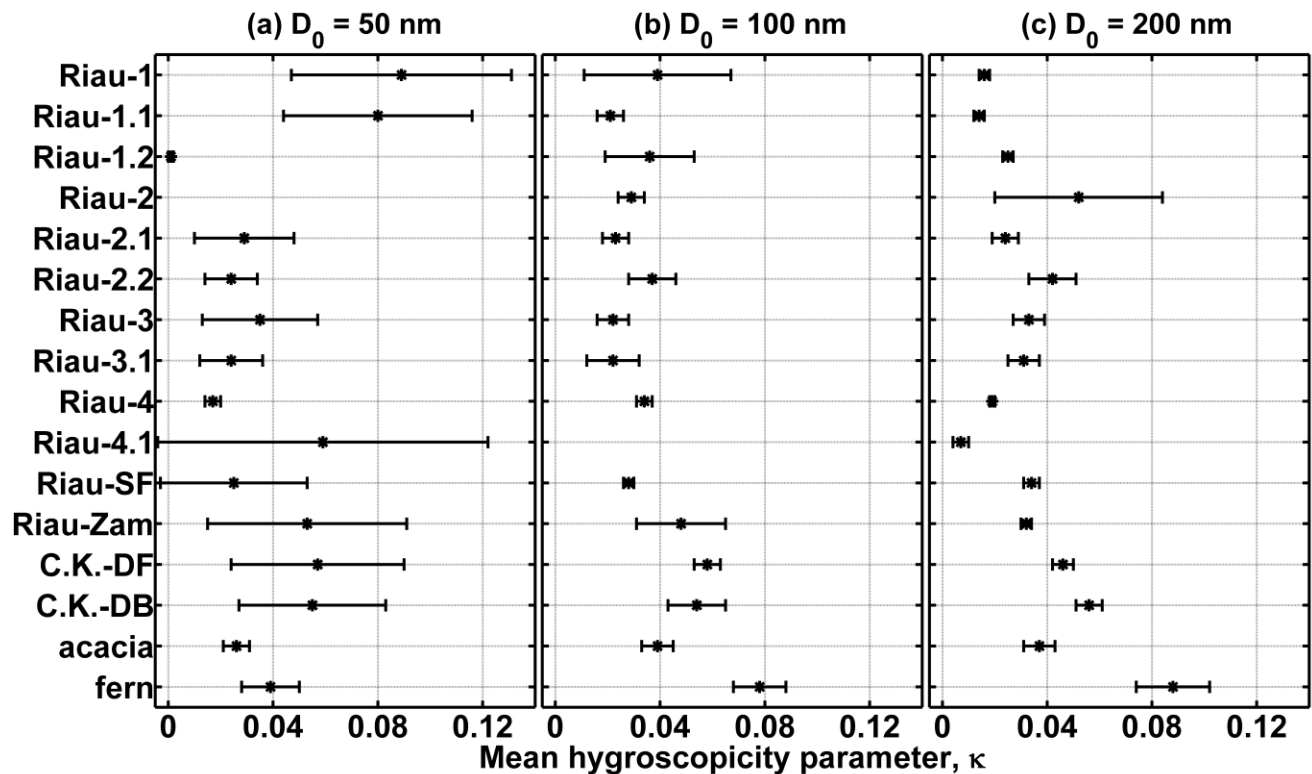

2

3 **Fig.3** Mean  $\kappa$  values of fresh Indonesian biomass burning particles measured for (a)  $D_0 = 50$  nm,  
 4 (b)  $D_0 = 100$  nm, and (c)  $D_0 = 200$  nm particles. In all cases,  $\kappa$  values are lower than 0.1. The  
 5 largest  $\kappa$  values were measured for fern burning particles ( $D_0 = 100$  nm and  $D_0 = 200$  nm).  
 6 Particles emitted from combustion of peat at Central Kalimantan are generally more hygroscopic  
 7 than those from Riau, Sumatra. Error bars denote the corresponding standard deviations.

8



1

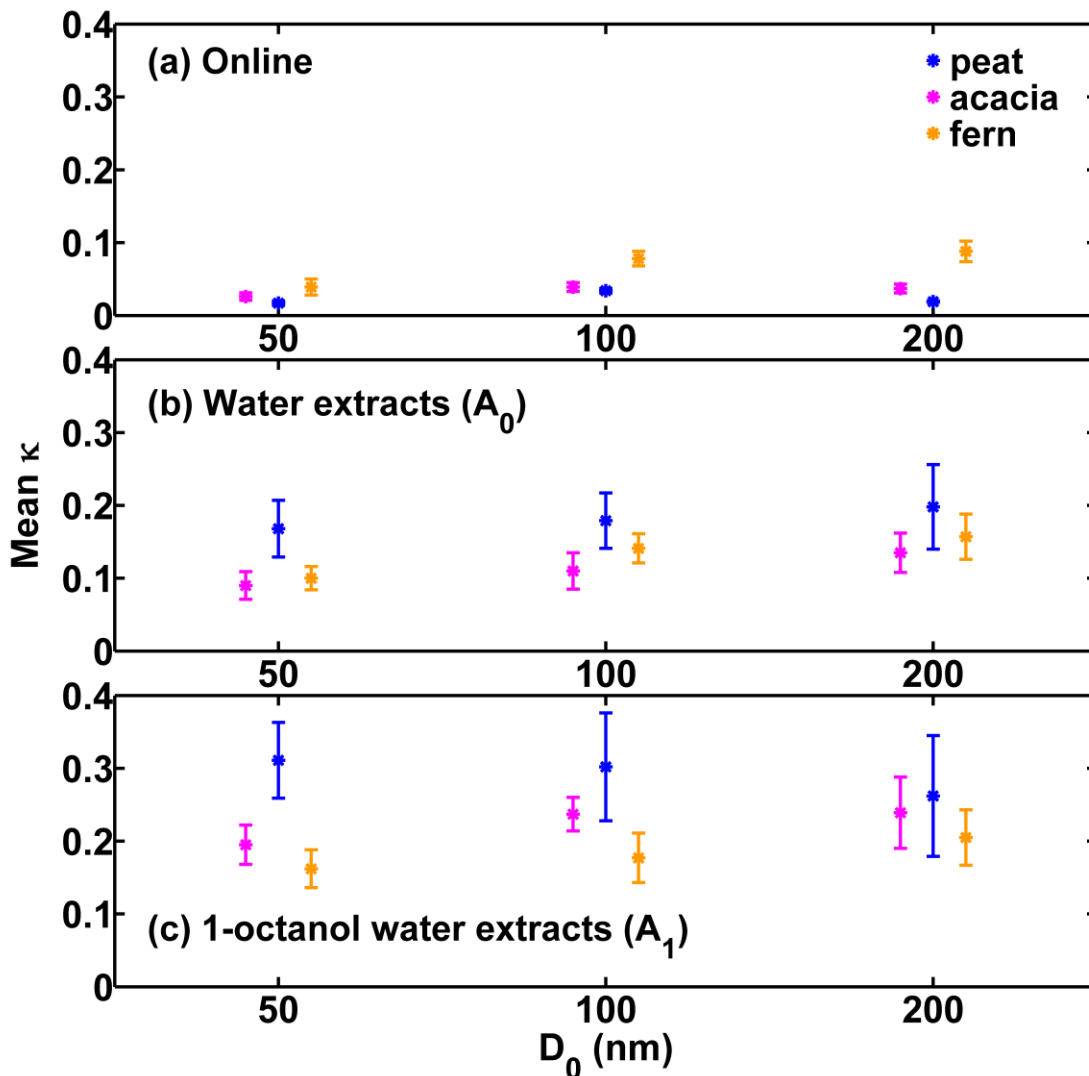

2

3 **Fig.4** Comparison of  $\kappa$  values for (a) online, (b) water extracts ( $A_0$ ), and (c) 1-octanol water  
4 extracts ( $A_1$ ). The data for peat (Riau-4), acacia, and fern are shown. Indonesian peat burning  
5 particles are almost non-hygroscopic for online data, while their water soluble organic fractions  
6 are highly hygroscopic.

7

1

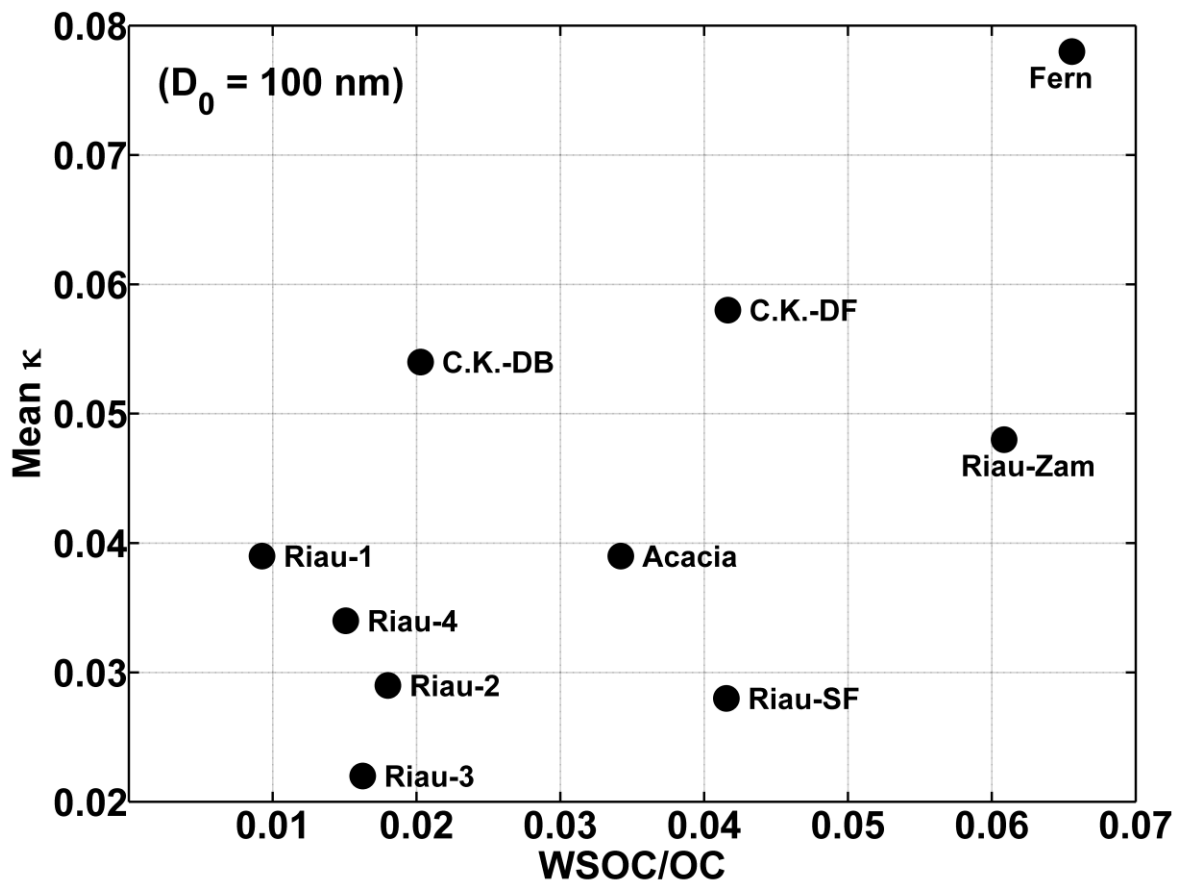

2

3 **Fig.5** Correlation of  $\kappa$  and WSOC/OC ratio for different types of Indonesian peat and biomasses.

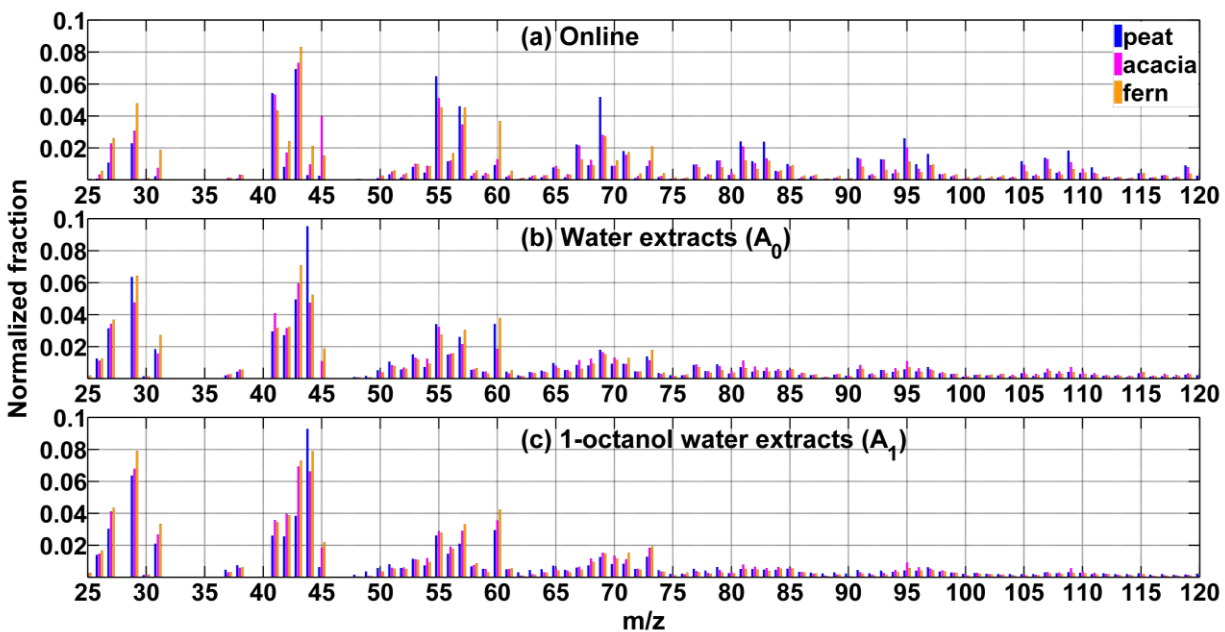

1

2 **Fig.6** Mass spectra of organics in Indonesian biomass burning particles measured for peat, acacia,  
 3 and fern samples. (a) online, (b)  $A_0$ , and (c)  $A_1$  data are shown. Ion signals ( $m/z$ ) from  
 4 hydrocarbon-like organic compounds (e.g.,  $m/z$  41, 43, 55, 57) are prominent for online data,  
 5 while intensities of ions for oxygenated organics (e.g.,  $m/z$  44) and biomass burning tracers (e.g.,  
 6  $m/z$  60, 73) are relatively less intense. On the other hand, both  $m/z$  44 and  $m/z$  60 signals are  
 7 significant for mass spectra of  $A_0$  and  $A_1$ . See the text for details.

8

1

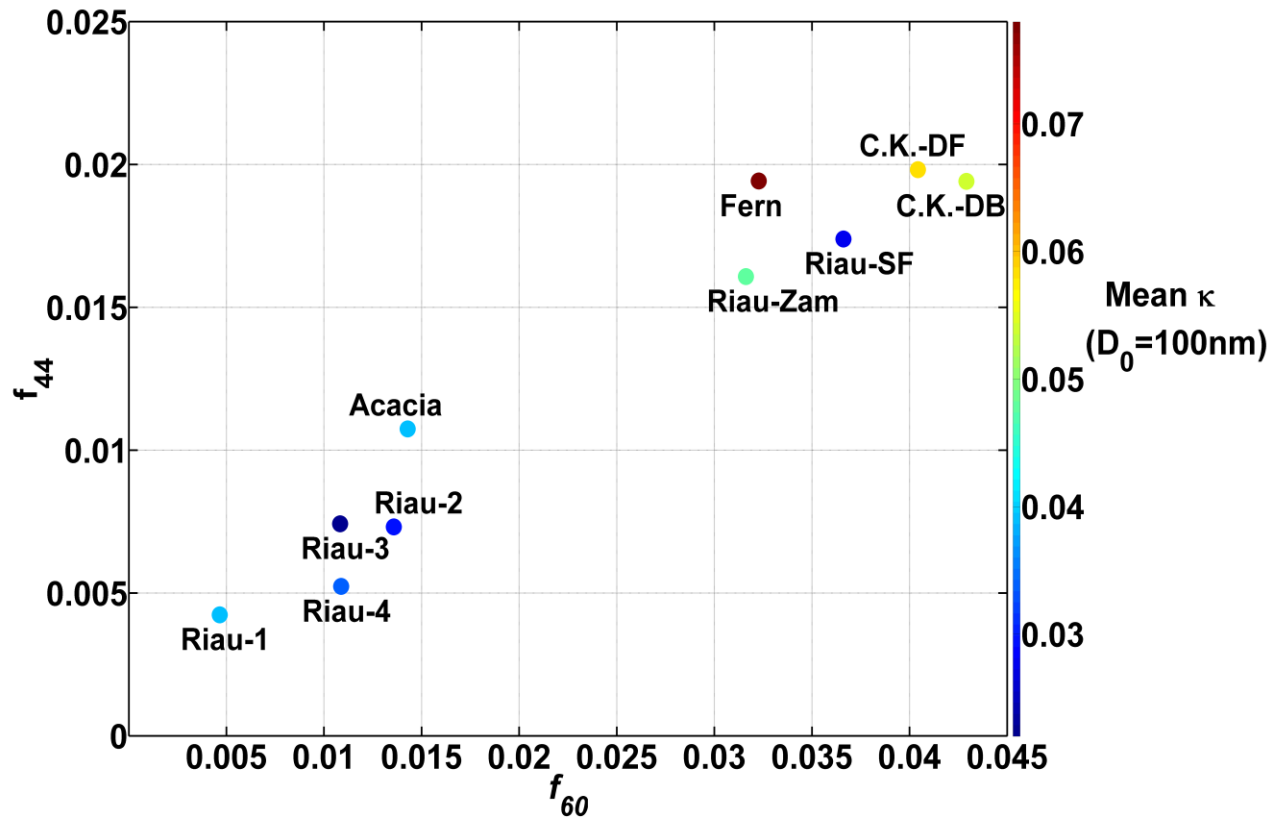

2

3 **Fig.7** Correlation of  $f_{44}$  and  $f_{60}$  for different types of Indonesian peat and biomasses.

4

1

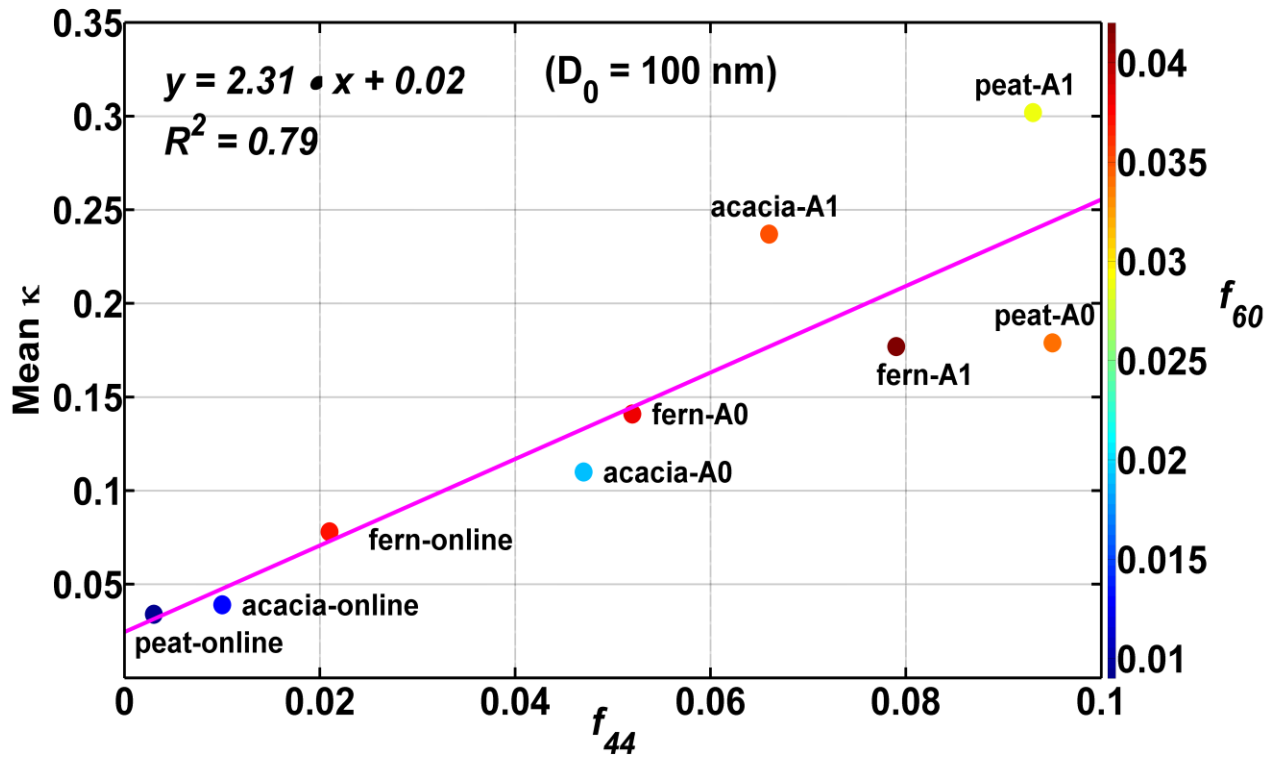

2

3 **Fig.8** Correlation of  $\kappa$  and  $f_{44}$ . The magenta line shows the result of fitting by the least-squares  
4 method.
